# Supplementary material for: Hypervalent iodine mediated synthesis of carbamate protected p-quinone monoimine ketals and p-benzoquinone monoketals
Source: Royal Society of Chemistry journal article supplement (doi:10.1039/c2ob25089f), 2012-01-01

**Hypervalent iodine mediated synthesis of  
carbamate protected *p*-quinone monoimine ketals and *p*-benzoquinone monoketals**

Naganjaneyulu Bodipati and Rama Krishna Peddinti\*

*Department of Chemistry, Indian Institute of Technology, Roorkee-247 667  
Uttarakhand, India.*

**Electronic Supplementary Information**

**Table of Contents**

|                                                                                             |            |
|---------------------------------------------------------------------------------------------|------------|
| <sup>1</sup> H NMR (500 MHz) and <sup>13</sup> C NMR (125 MHz) spectra of all products..... | S-2 – S-36 |
|---------------------------------------------------------------------------------------------|------------|

N-485

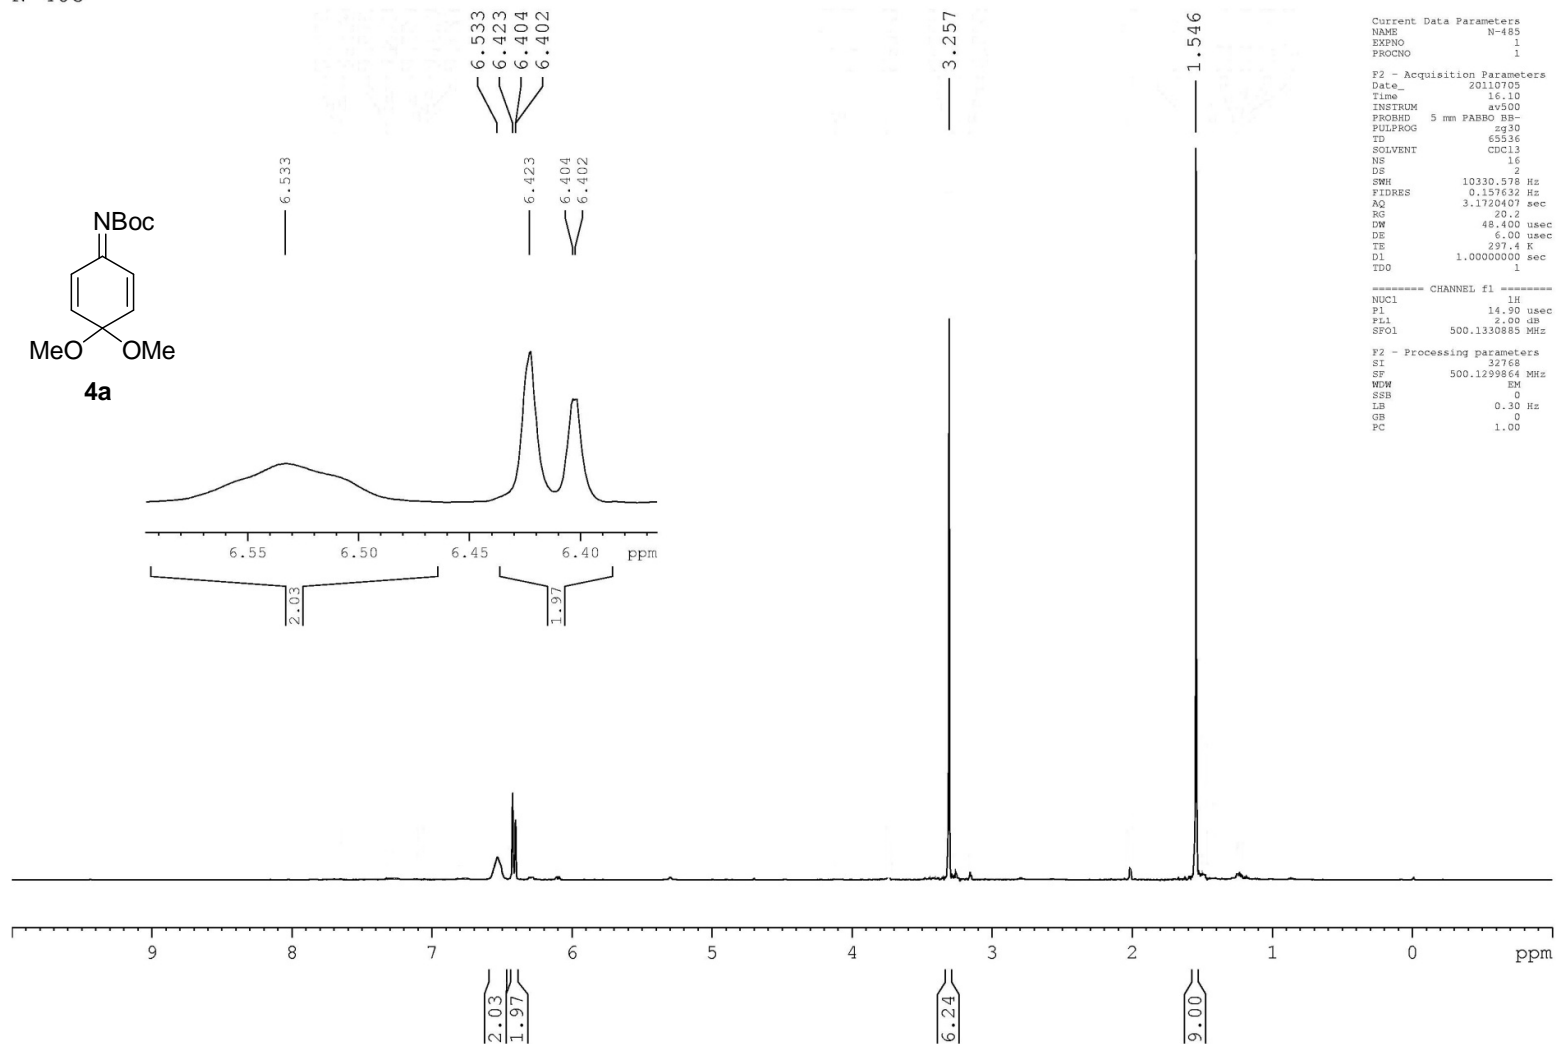

N-485-13C

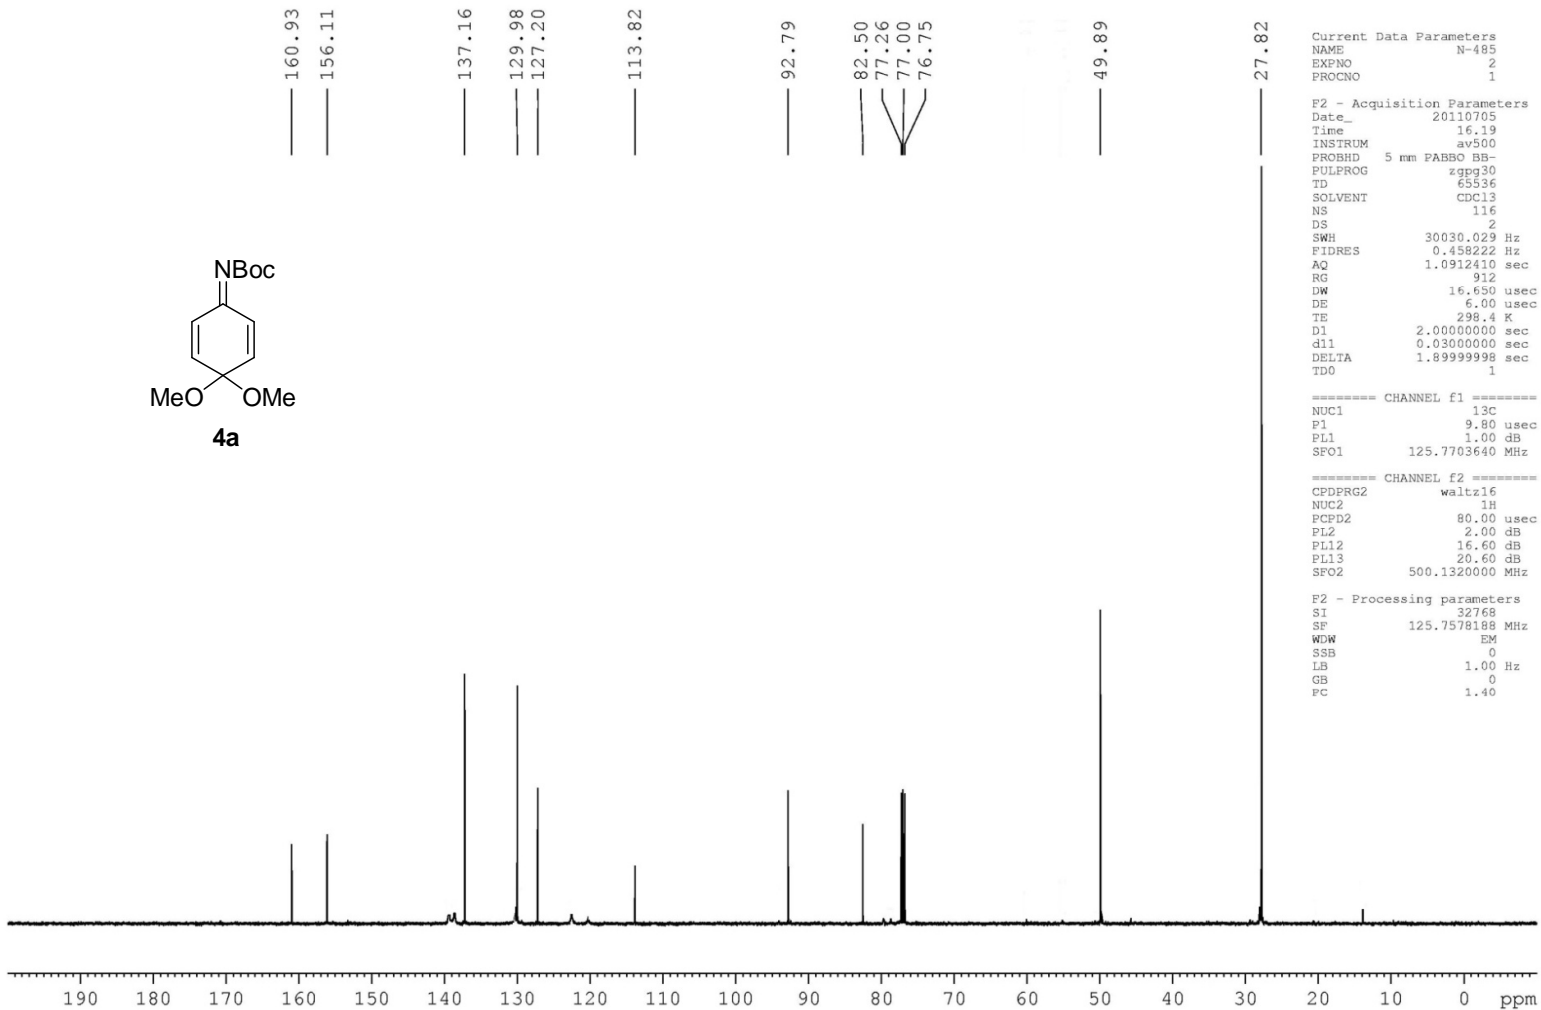

N-507-10SM

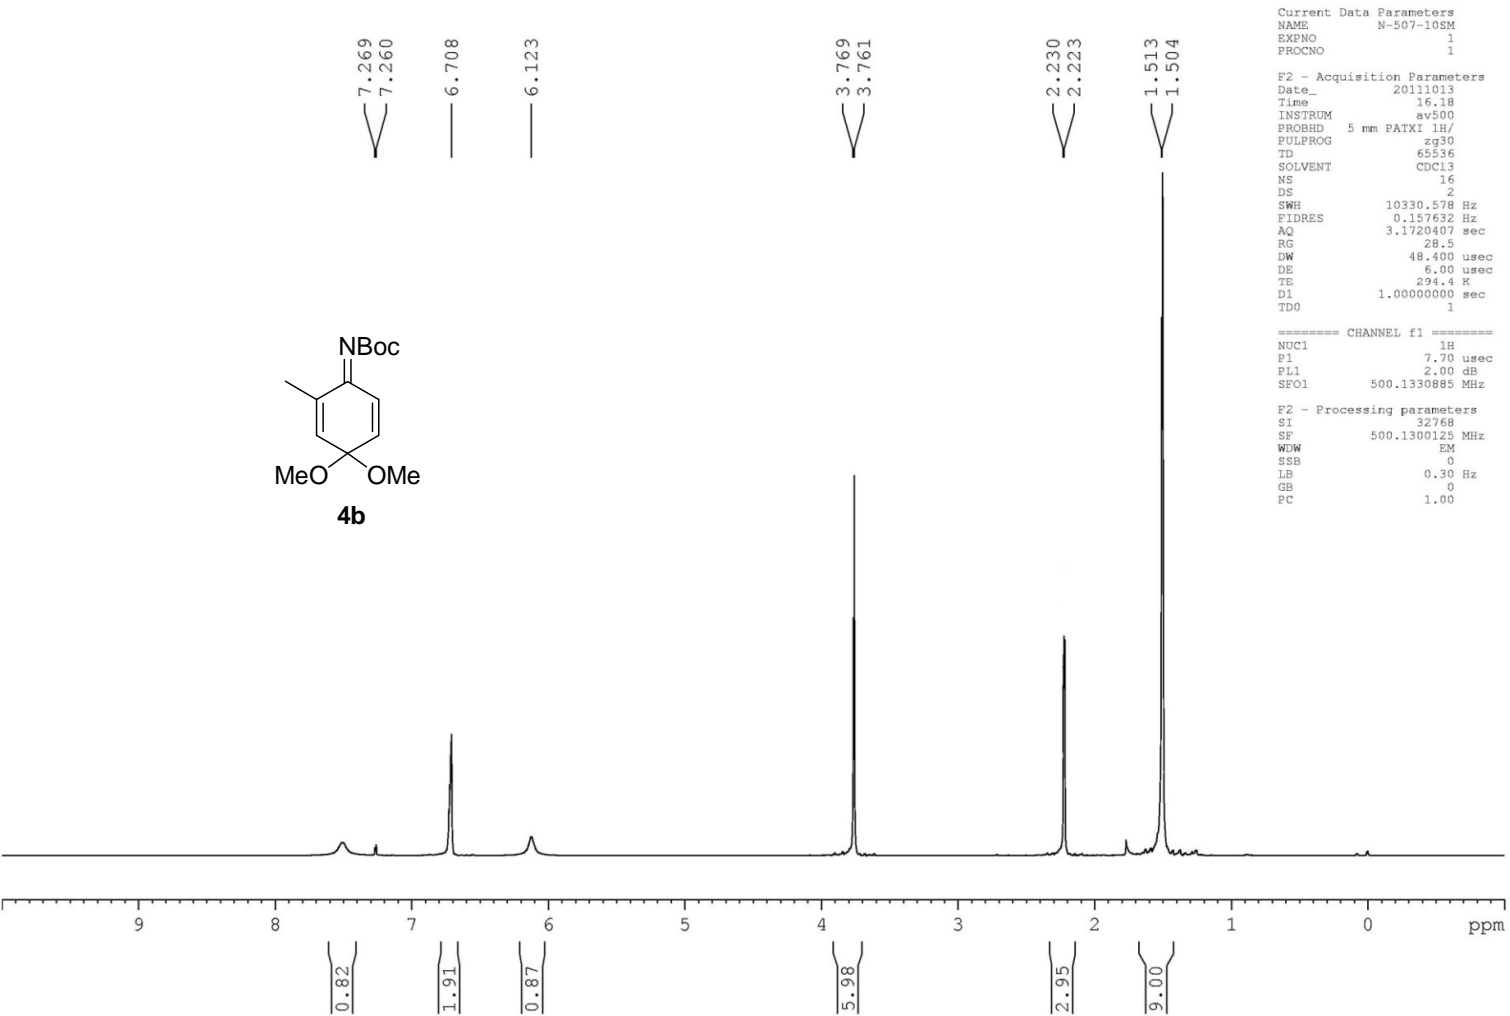

N-507-1113C

Current Data Parameters  
NAME N-507-1113C  
EXPNO 2  
PROCNO 1

F2 - Acquisition Parameters  
Date\_ 20111013  
Time 16.50  
INSTRUM av500  
PROBHD 5 mm PATXI 1H/  
PULPROG zgpg30  
TD 65536  
SOLVENT CDCl3  
NS 167  
DS 4  
SWH 30030.029 Hz  
FIDRES 0.438222 Hz  
AQ 1.0912410 sec  
RG 14600  
DW 16.650 usec  
DE 6.00 usec  
TE 294.6 K  
D1 2.00000000 sec  
d11 0.03000000 sec  
DELTA 1.89999998 sec  
TD0 1

===== CHANNEL f1 =====  
NUC1 13C  
P1 11.60 usec  
PL1 -5.00 dB  
SFO1 125.7703640 MHz

===== CHANNEL f2 =====  
CPDPRG2 waltz16  
NUC2 1H  
PCPD2 80.00 usec  
PL2 2.00 dB  
PL12 22.00 dB  
PL13 26.00 dB  
SFO2 500.1320000 MHz

F2 - Processing parameters  
SI 32768  
SF 125.7578255 MHz  
WDW EM  
SSB 0  
LB 1.00 Hz  
GB 0  
PC 1.40

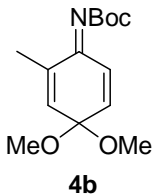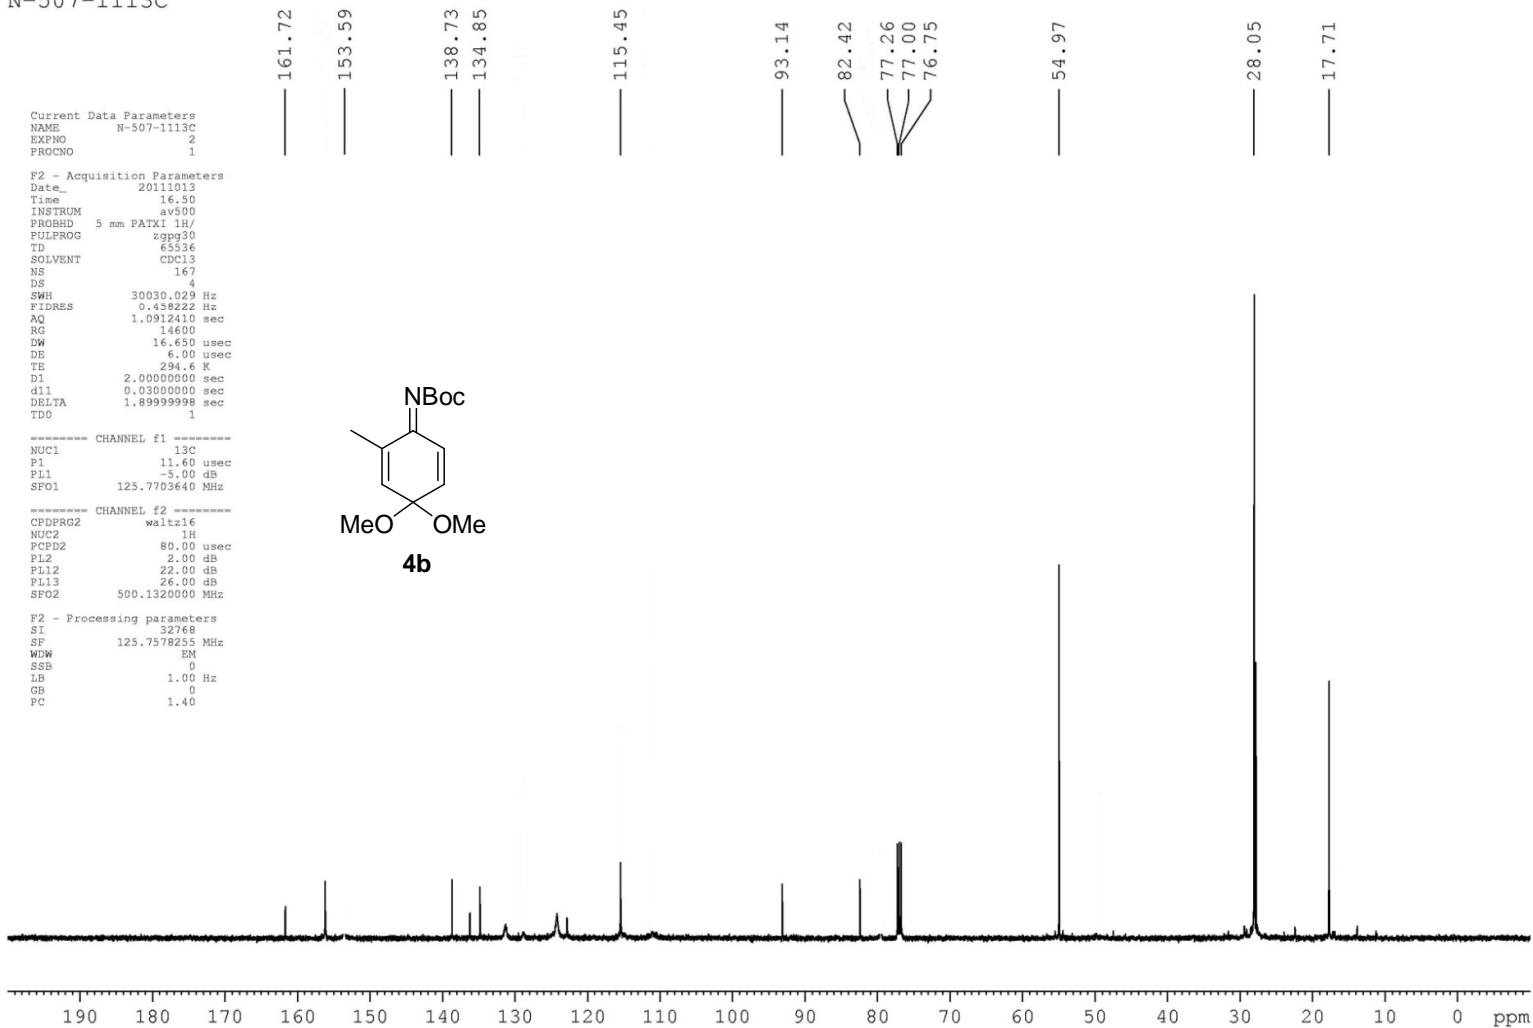

N-493

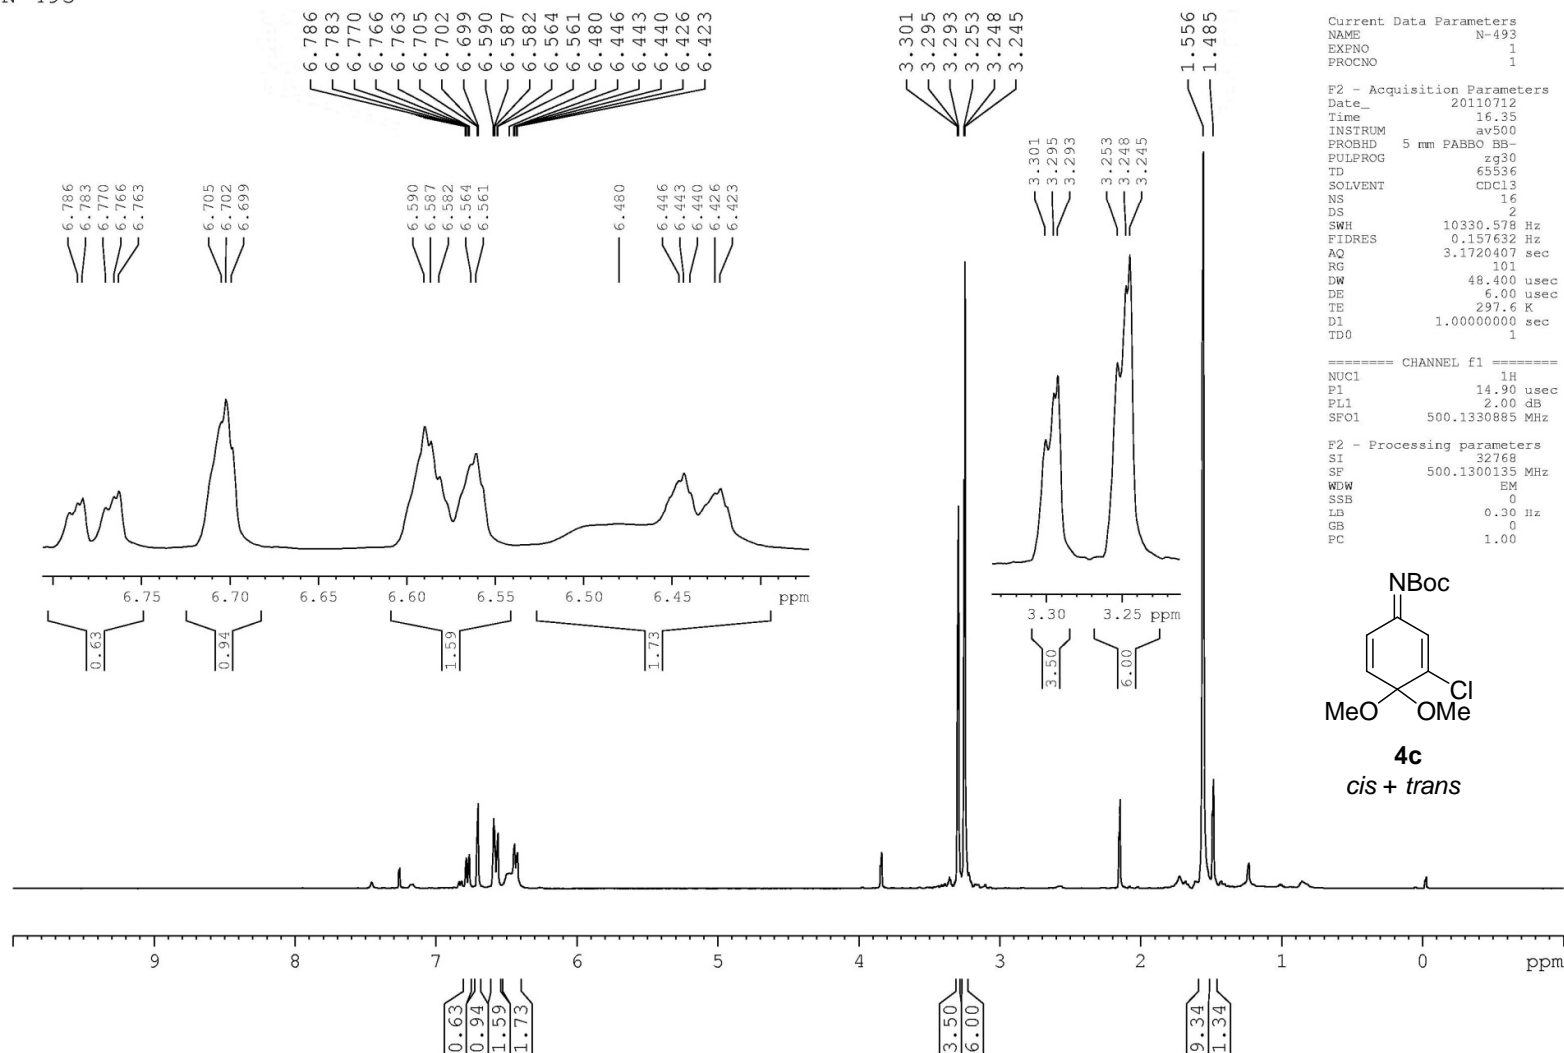

N-493-5

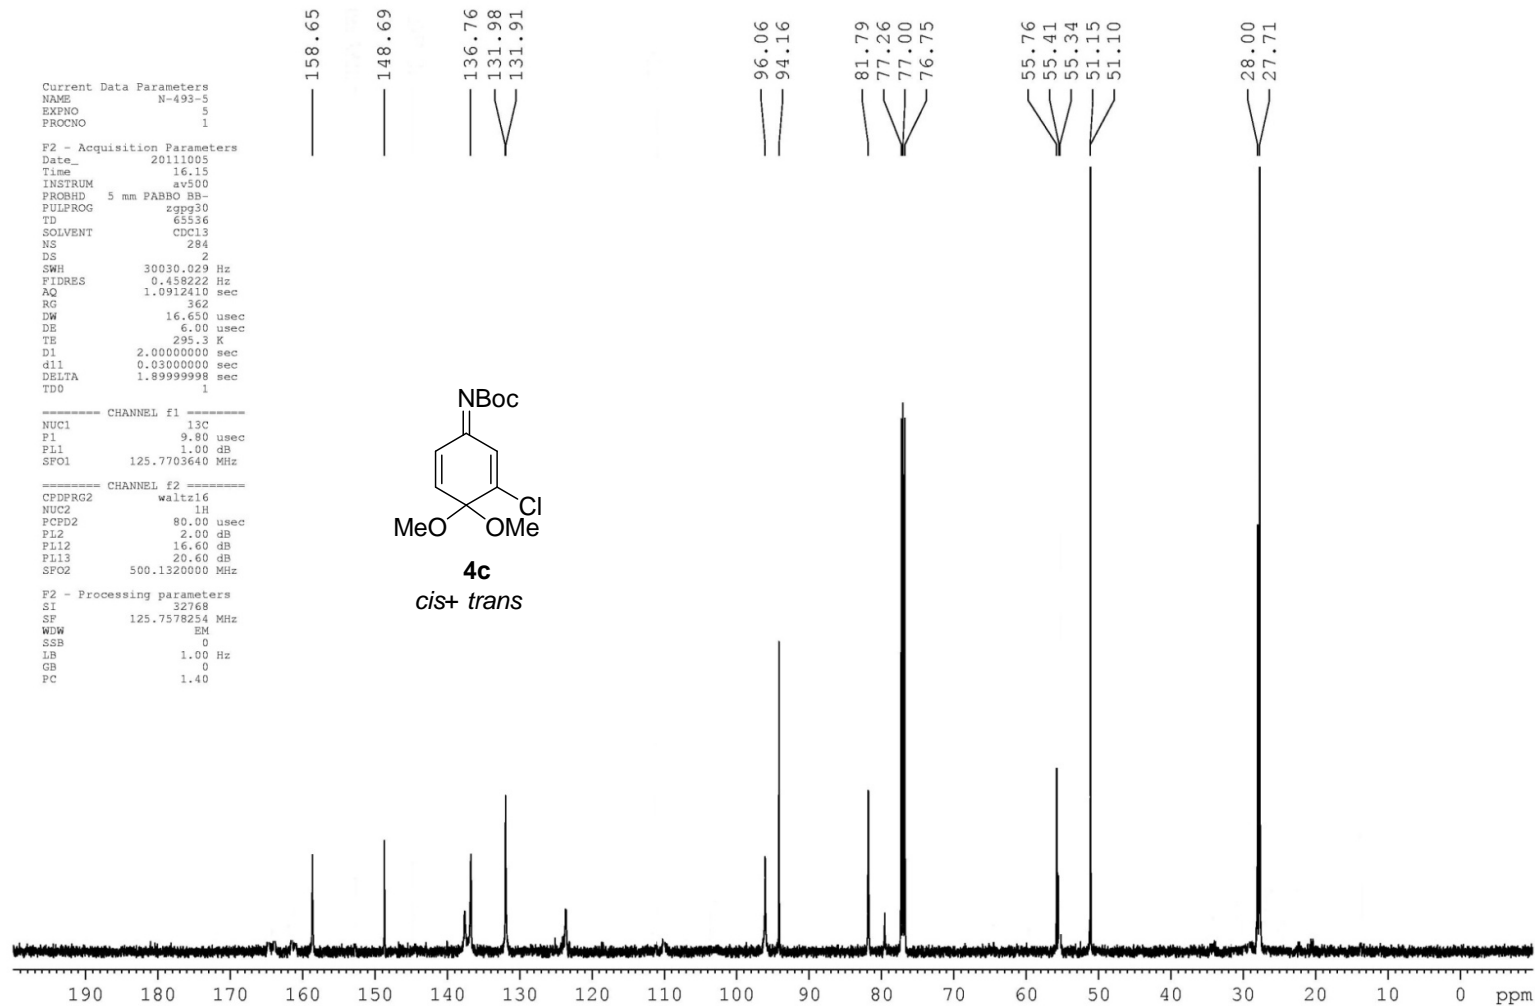

20

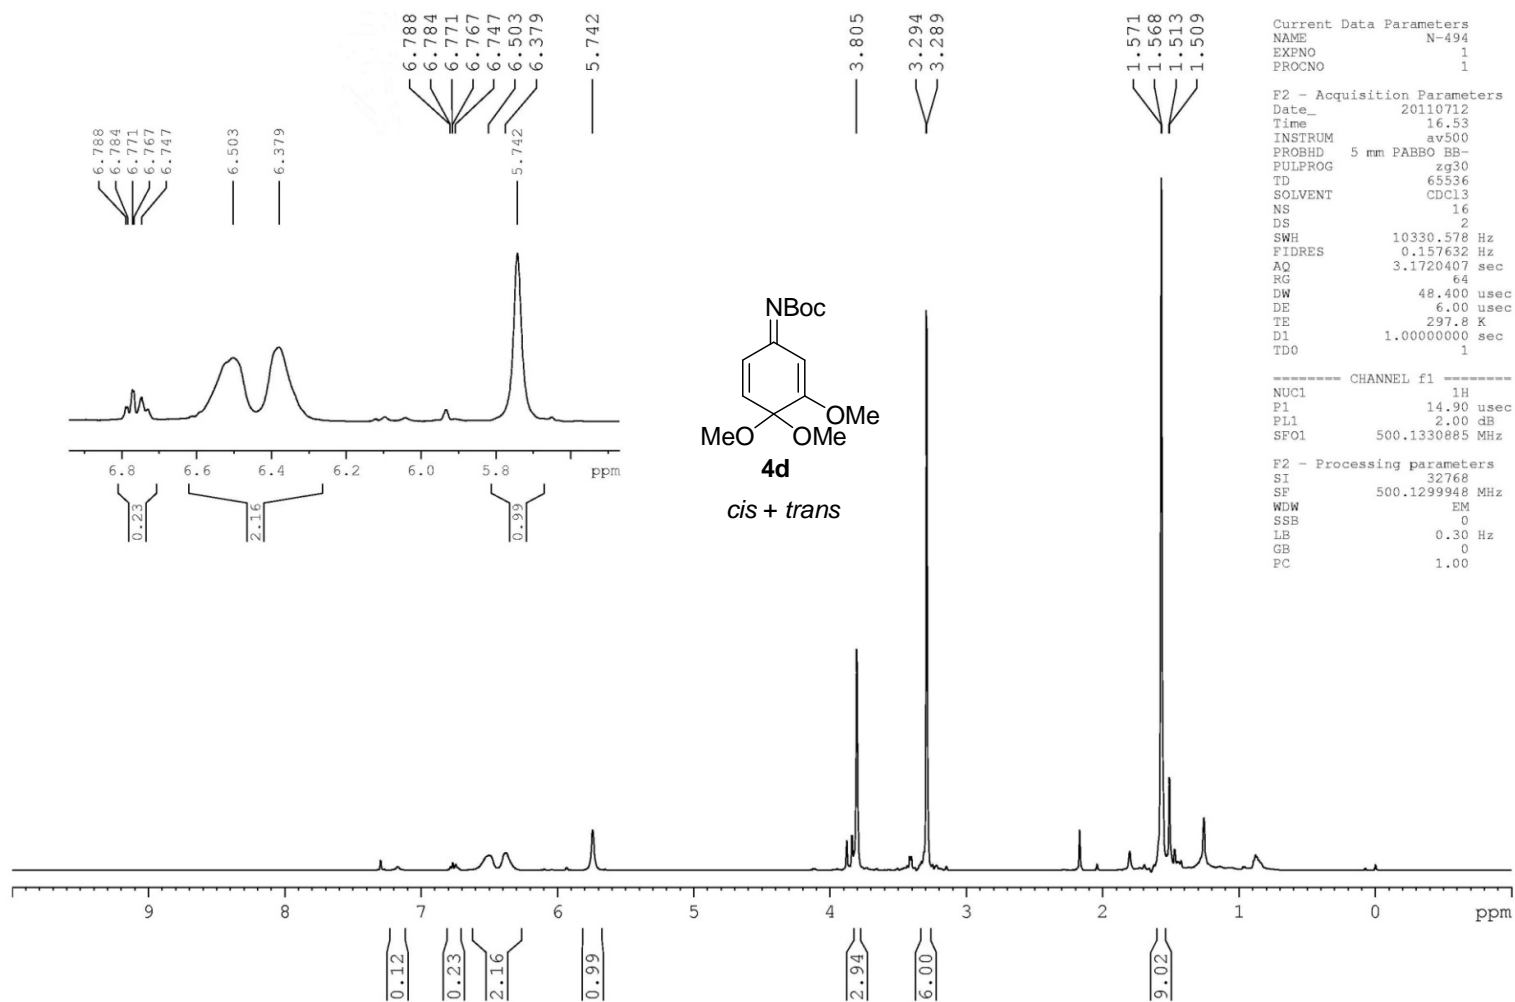

N-494-5

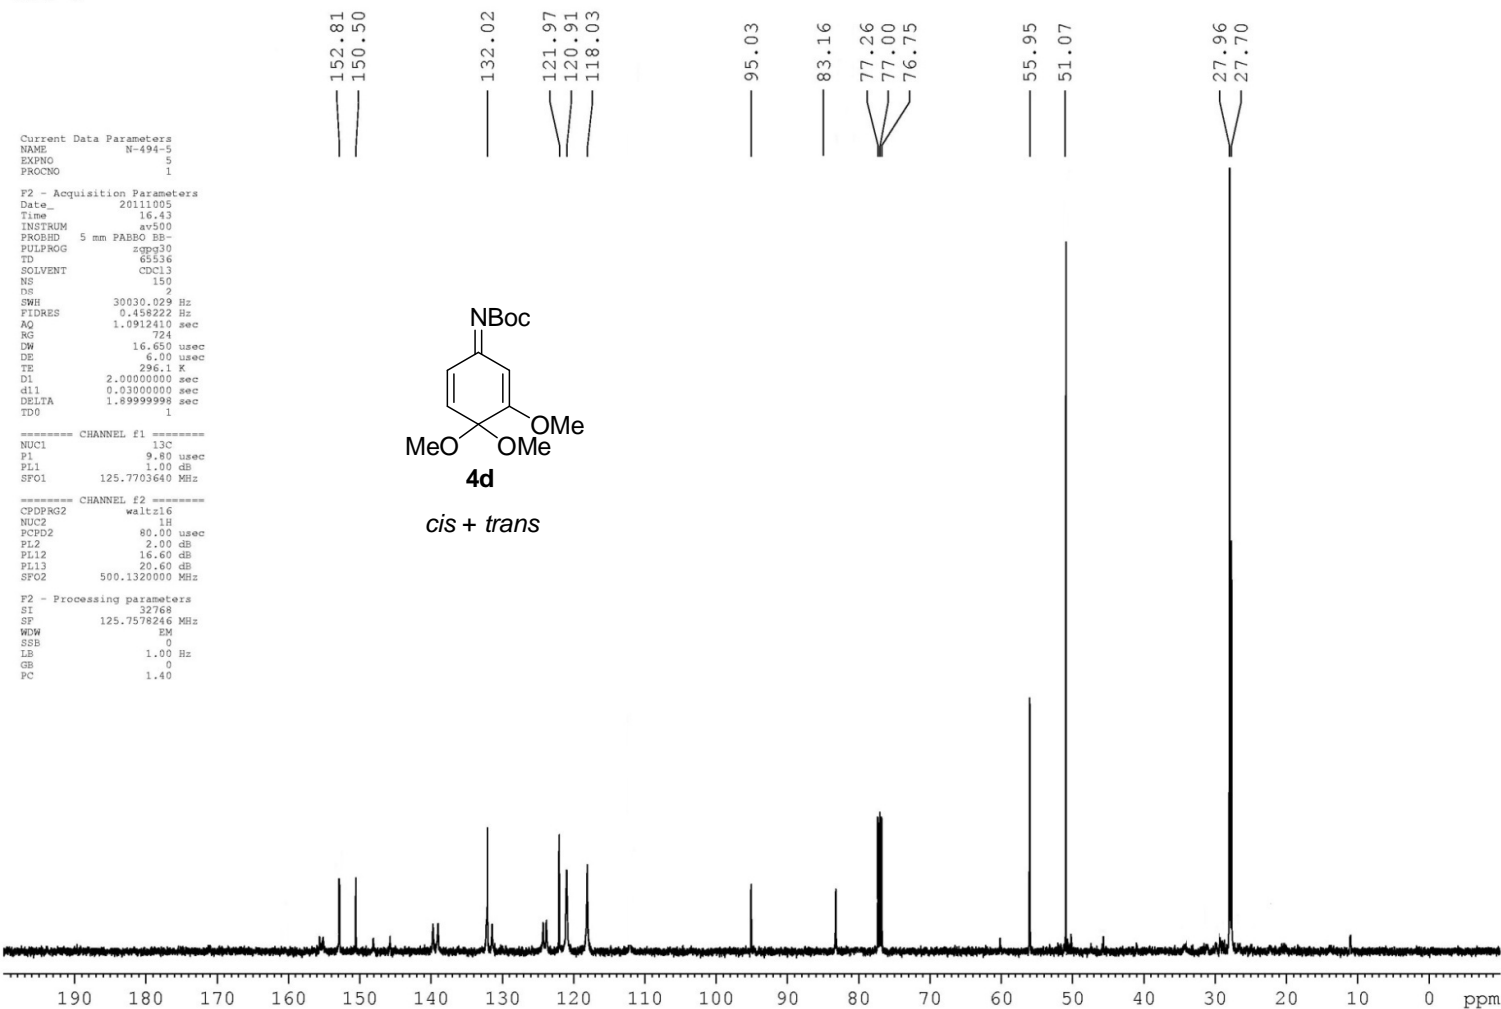

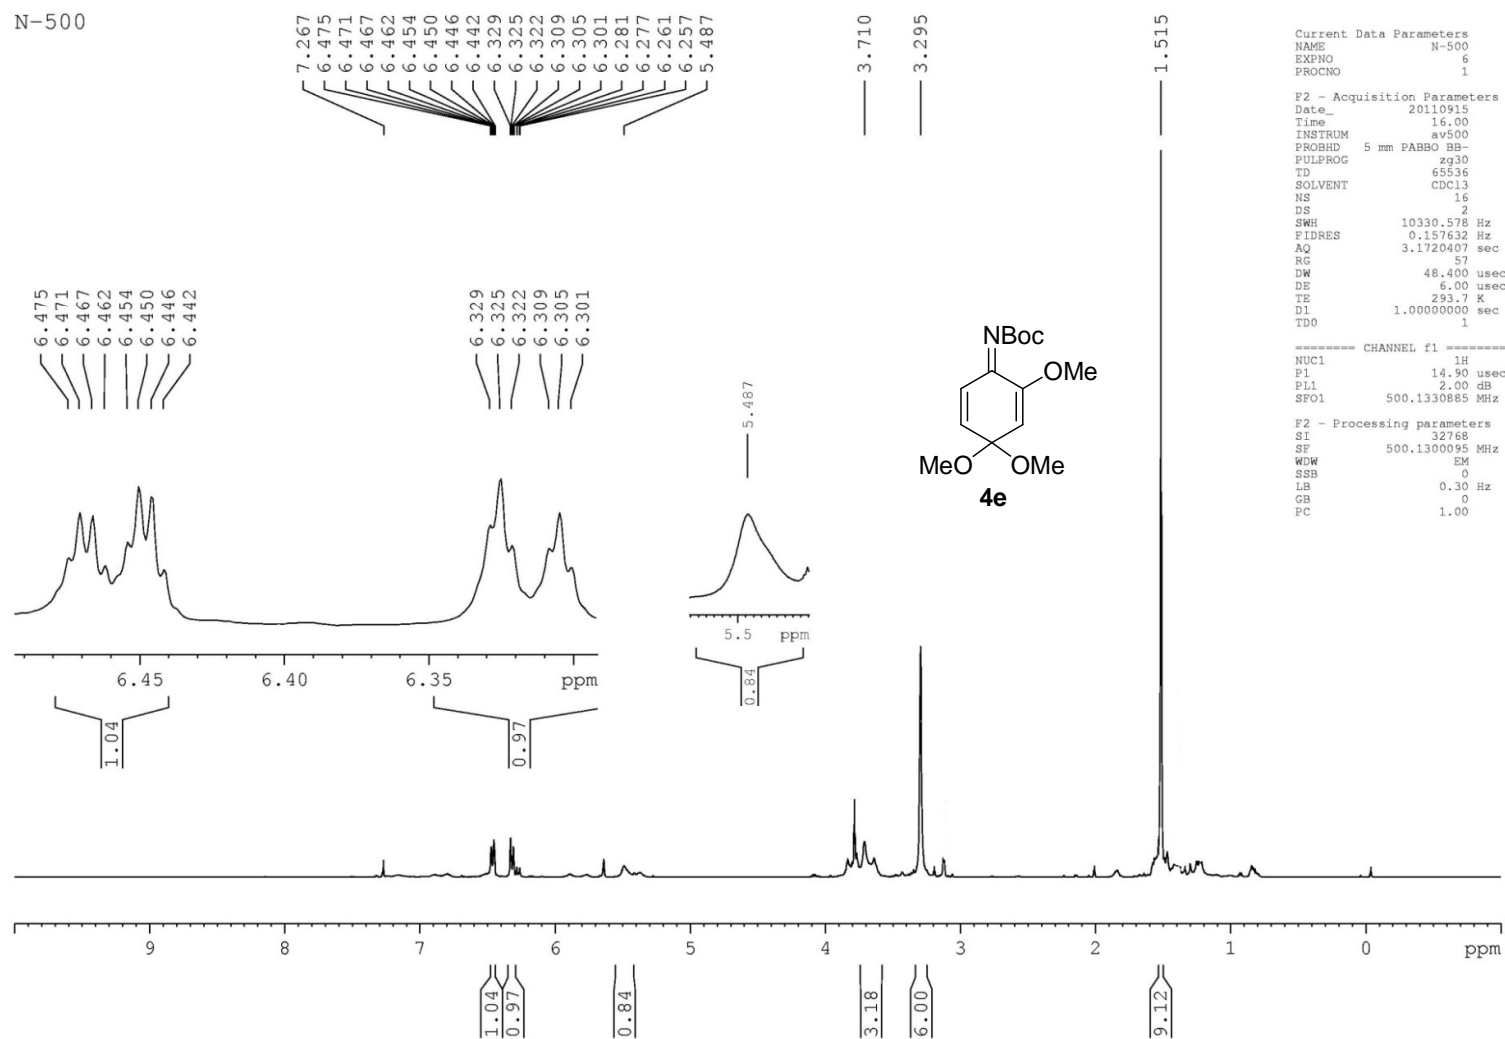

N-507-3

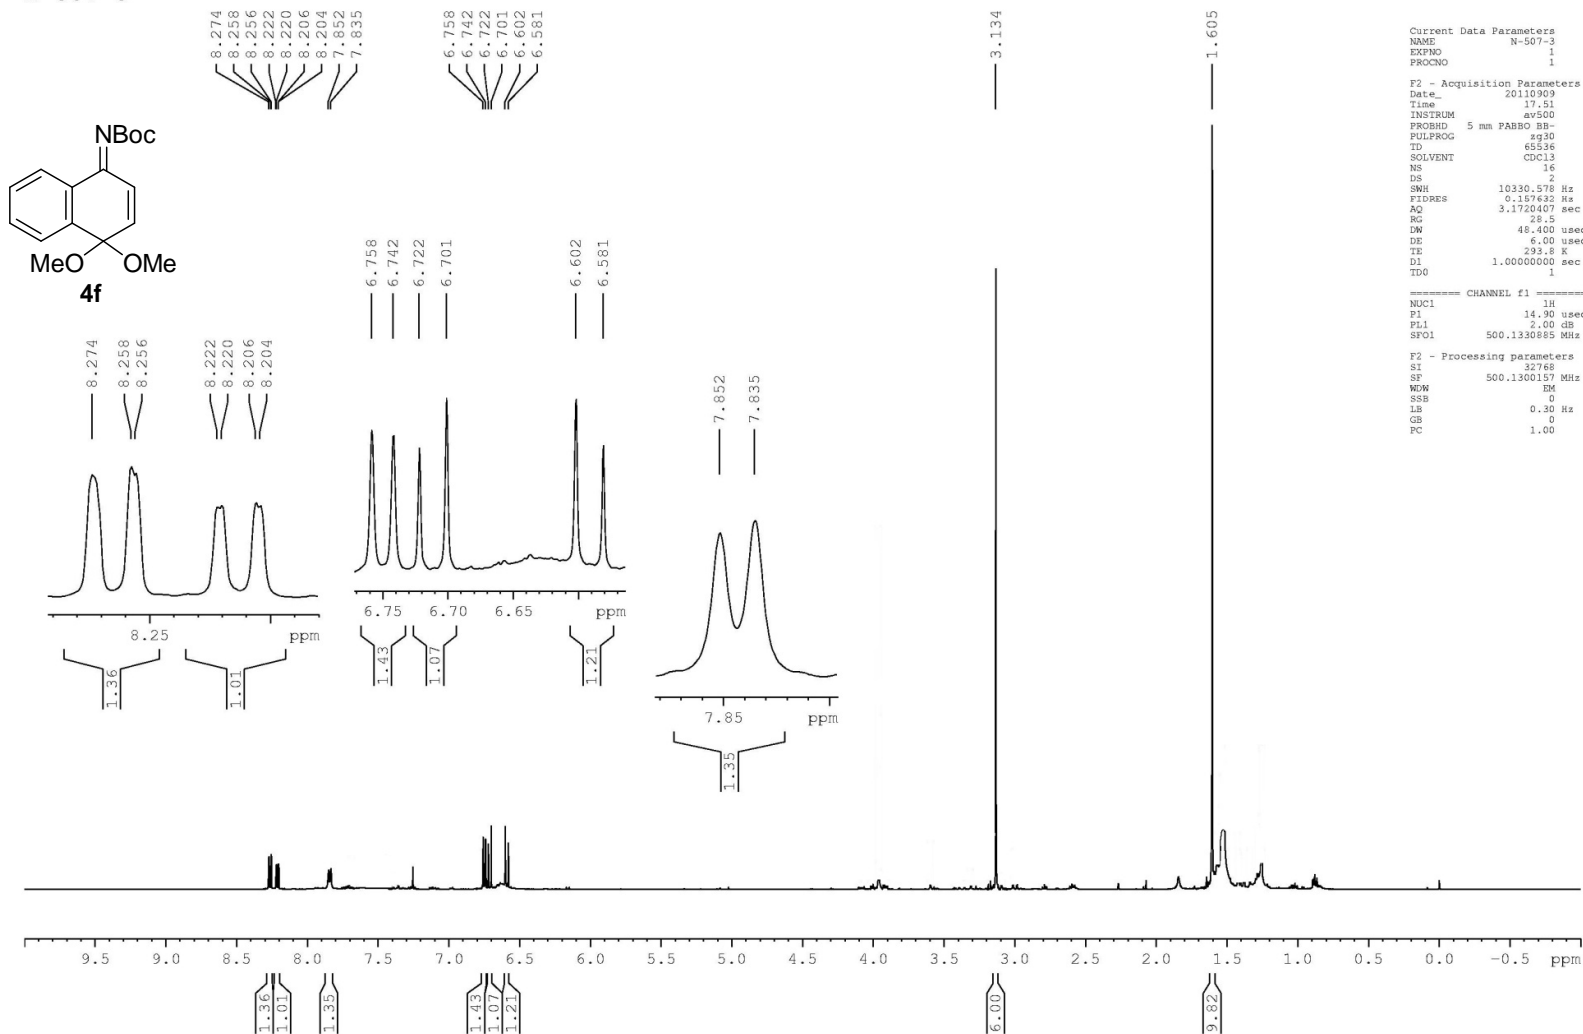

N-507-3

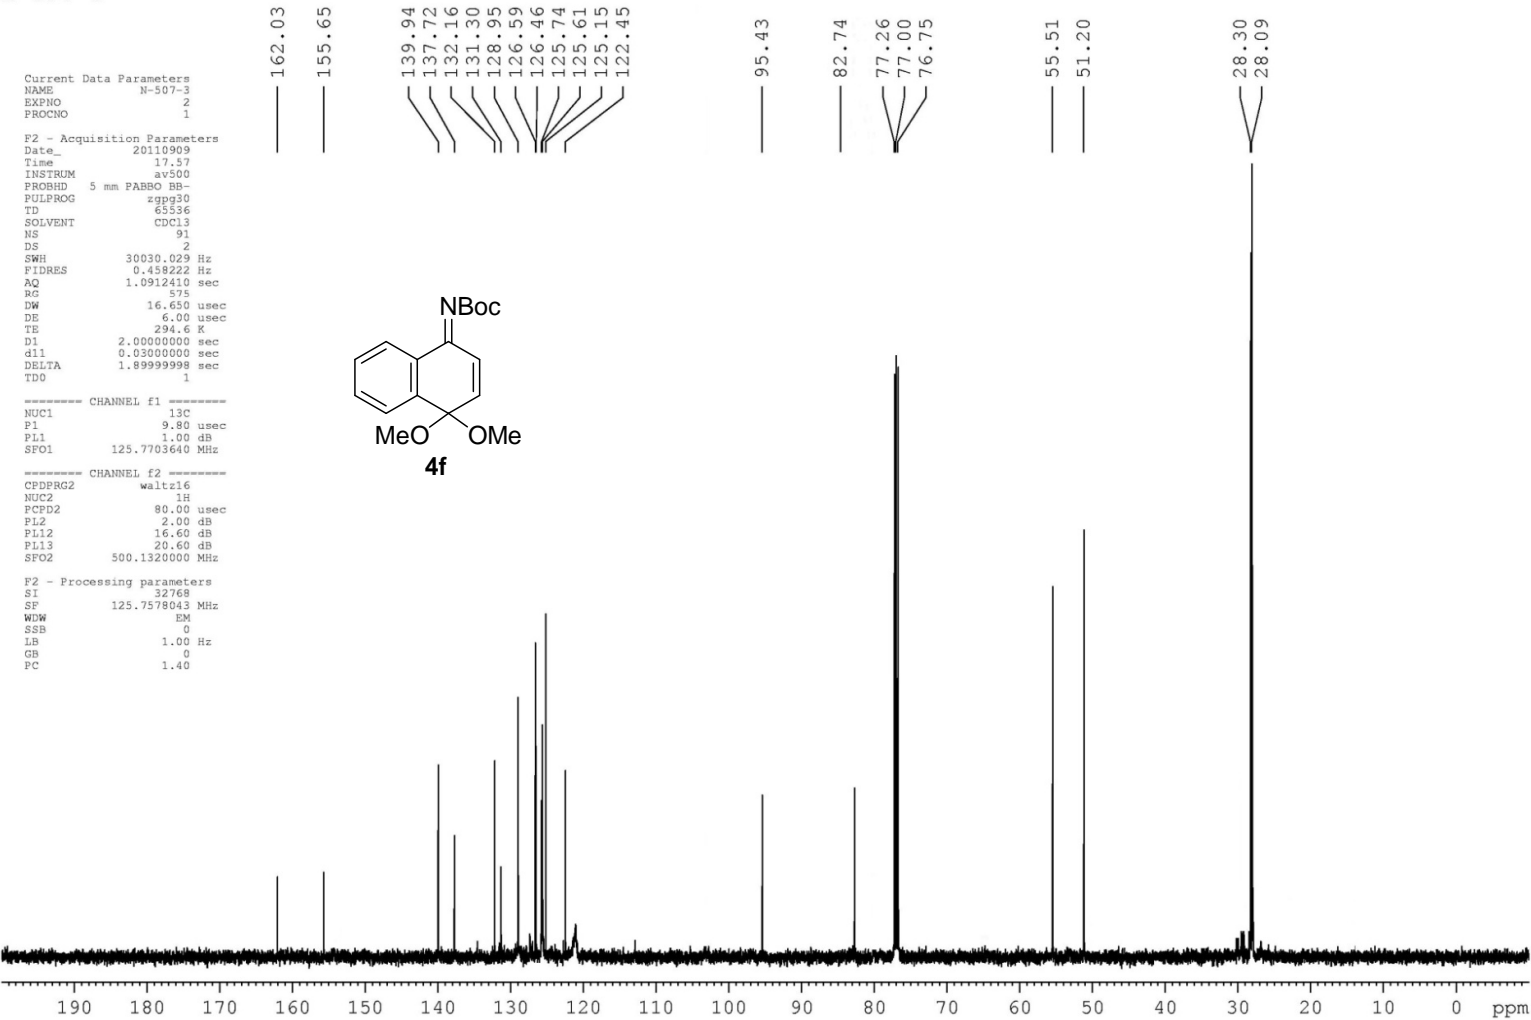

N-495

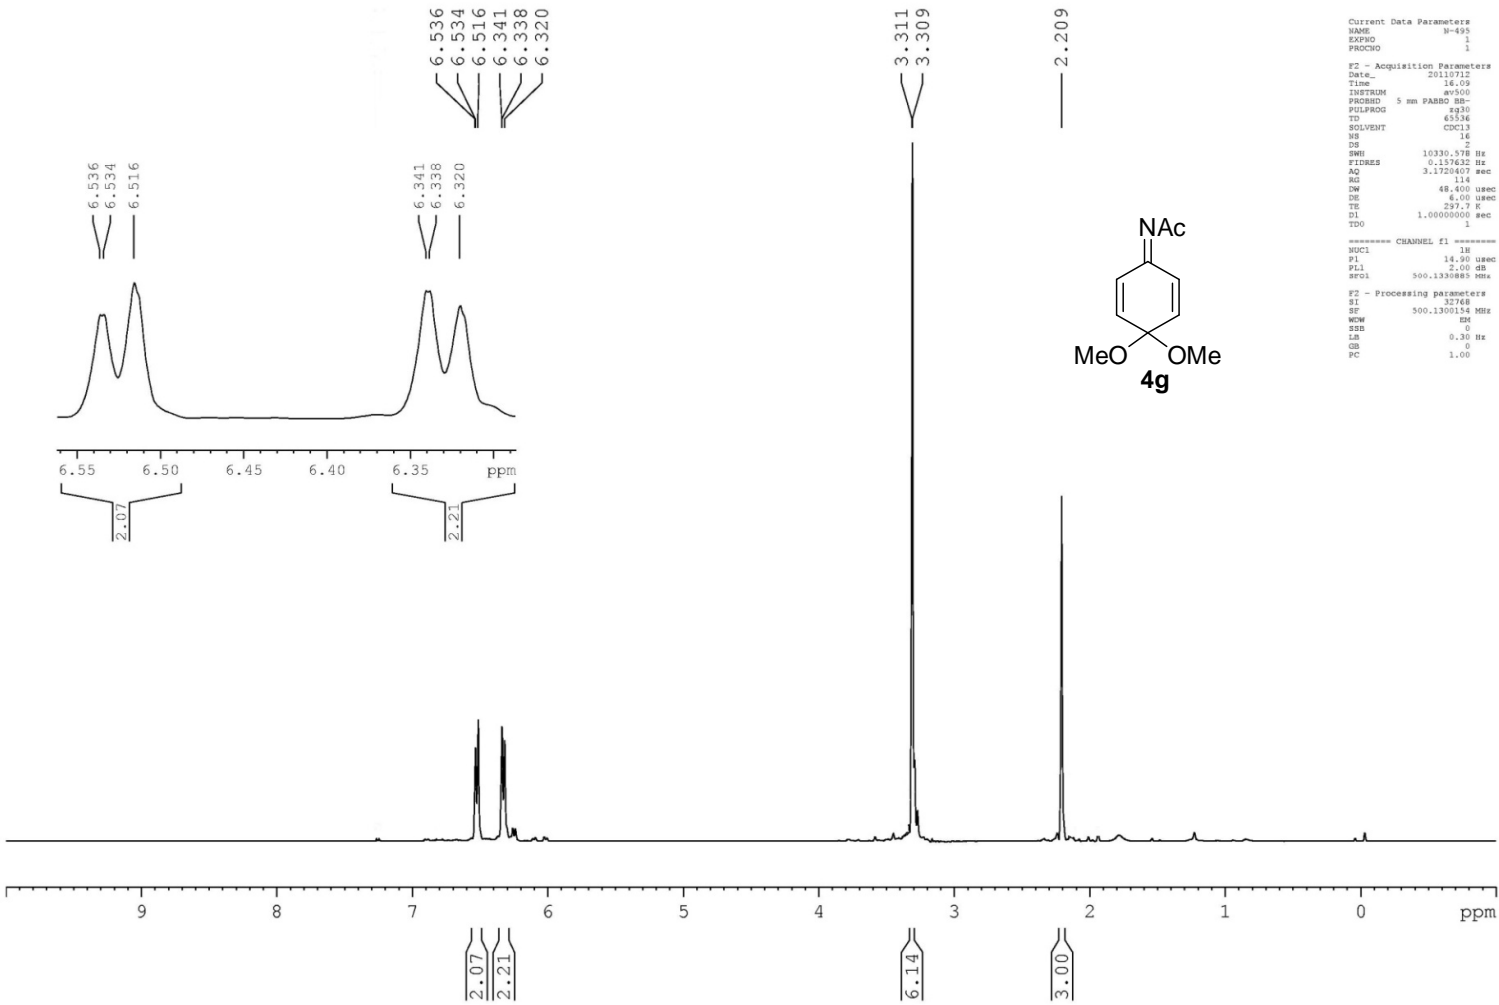

N-495

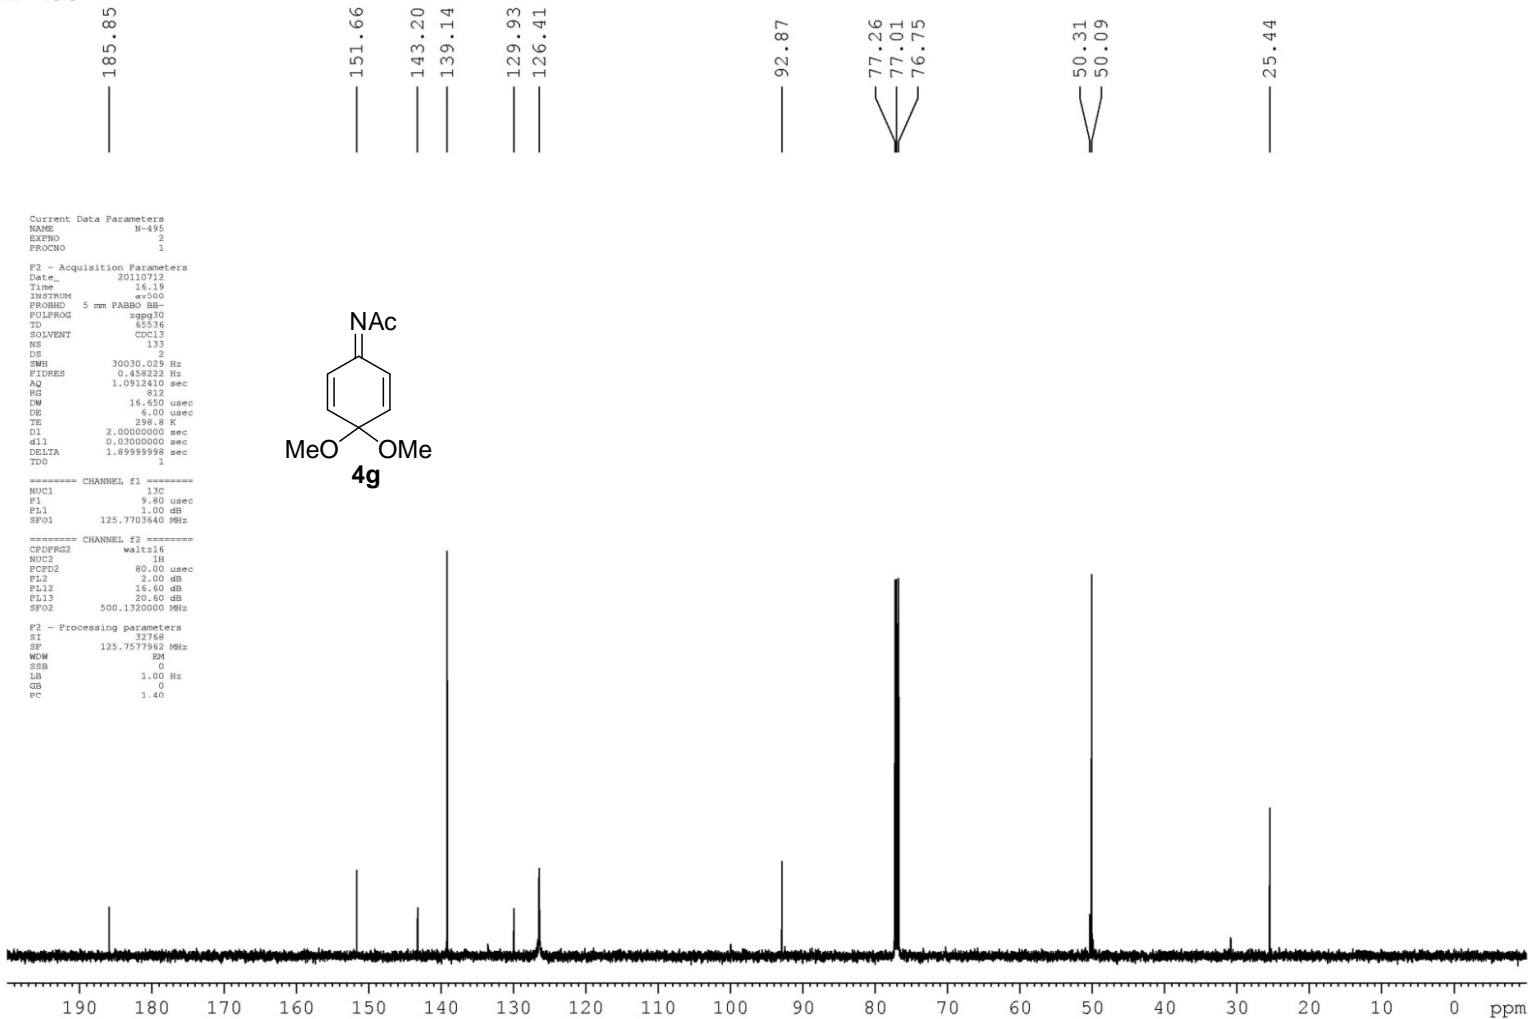

N-499

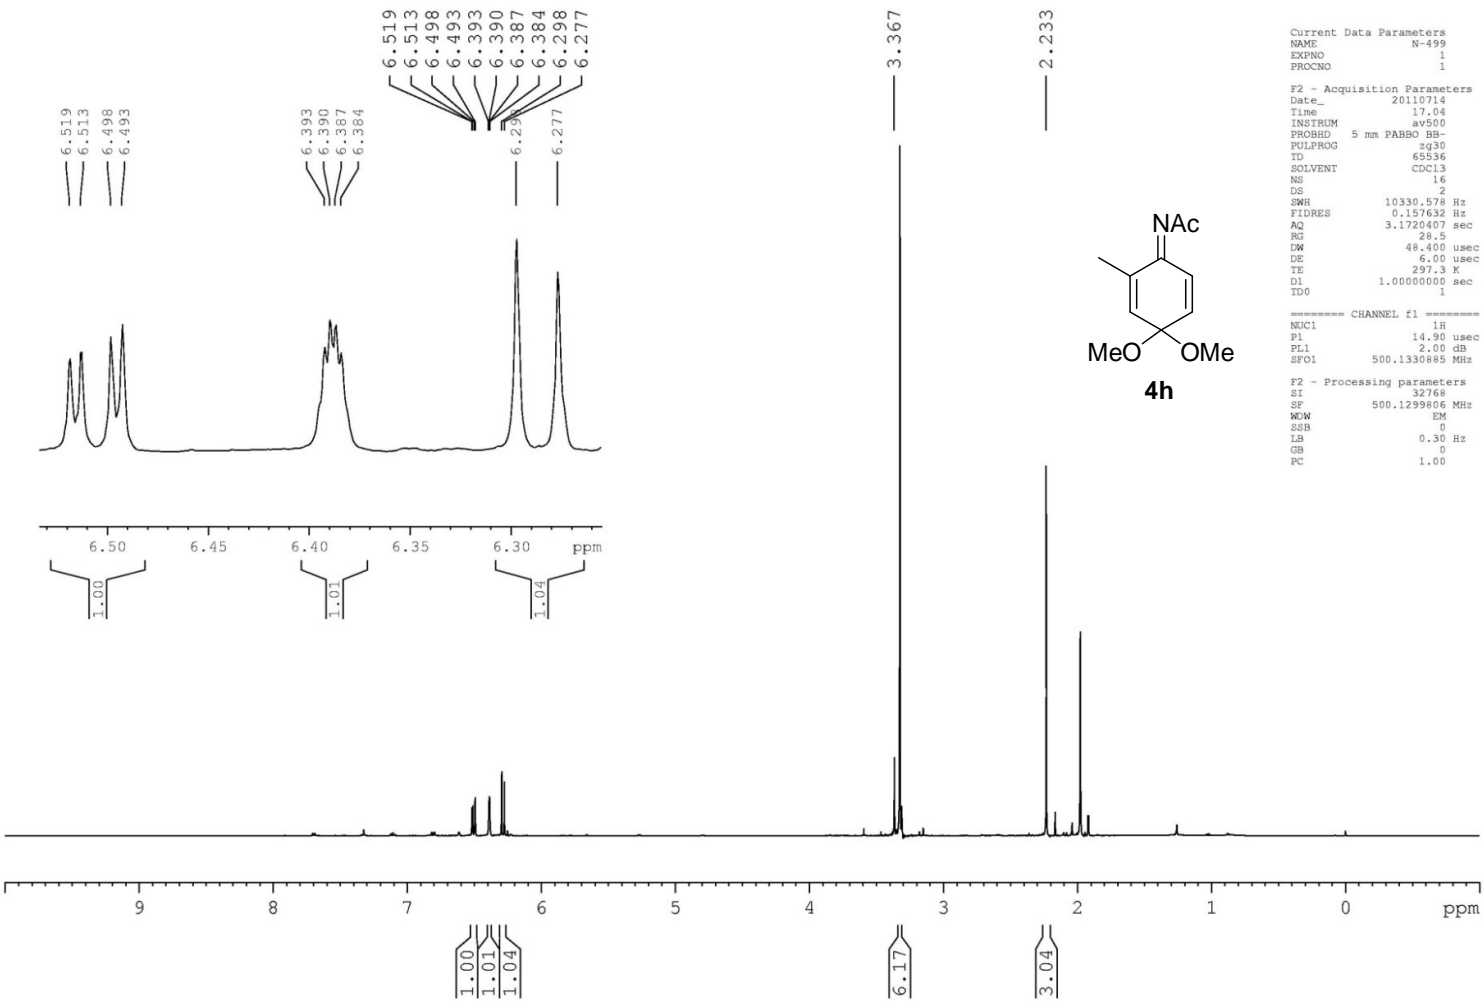

N-499

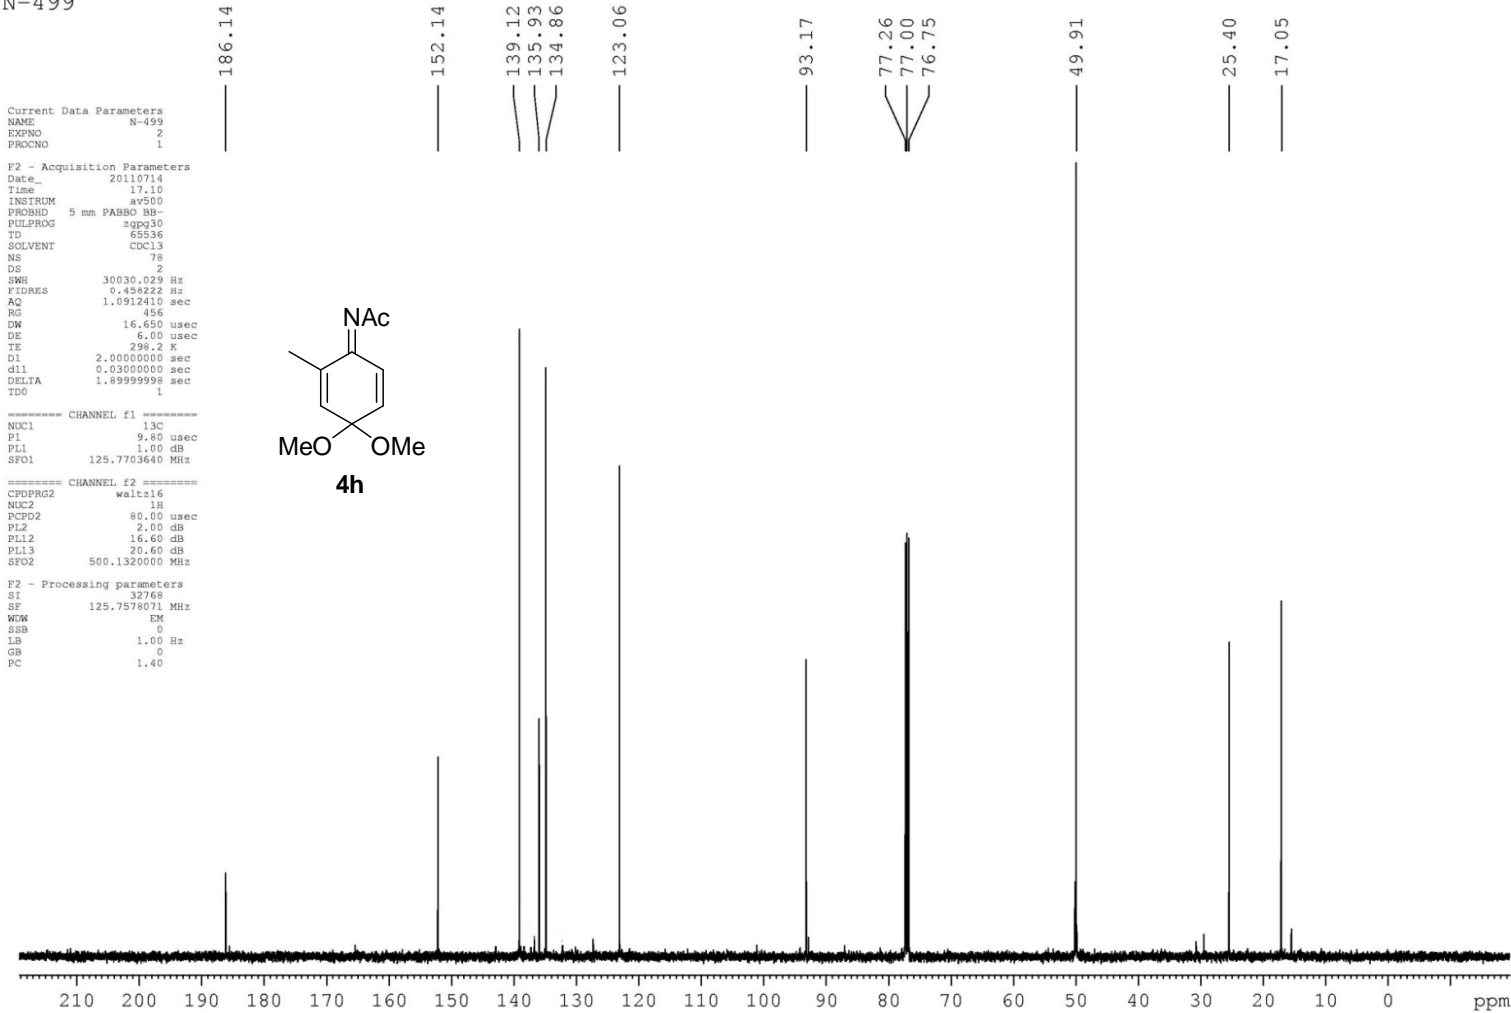

N-499

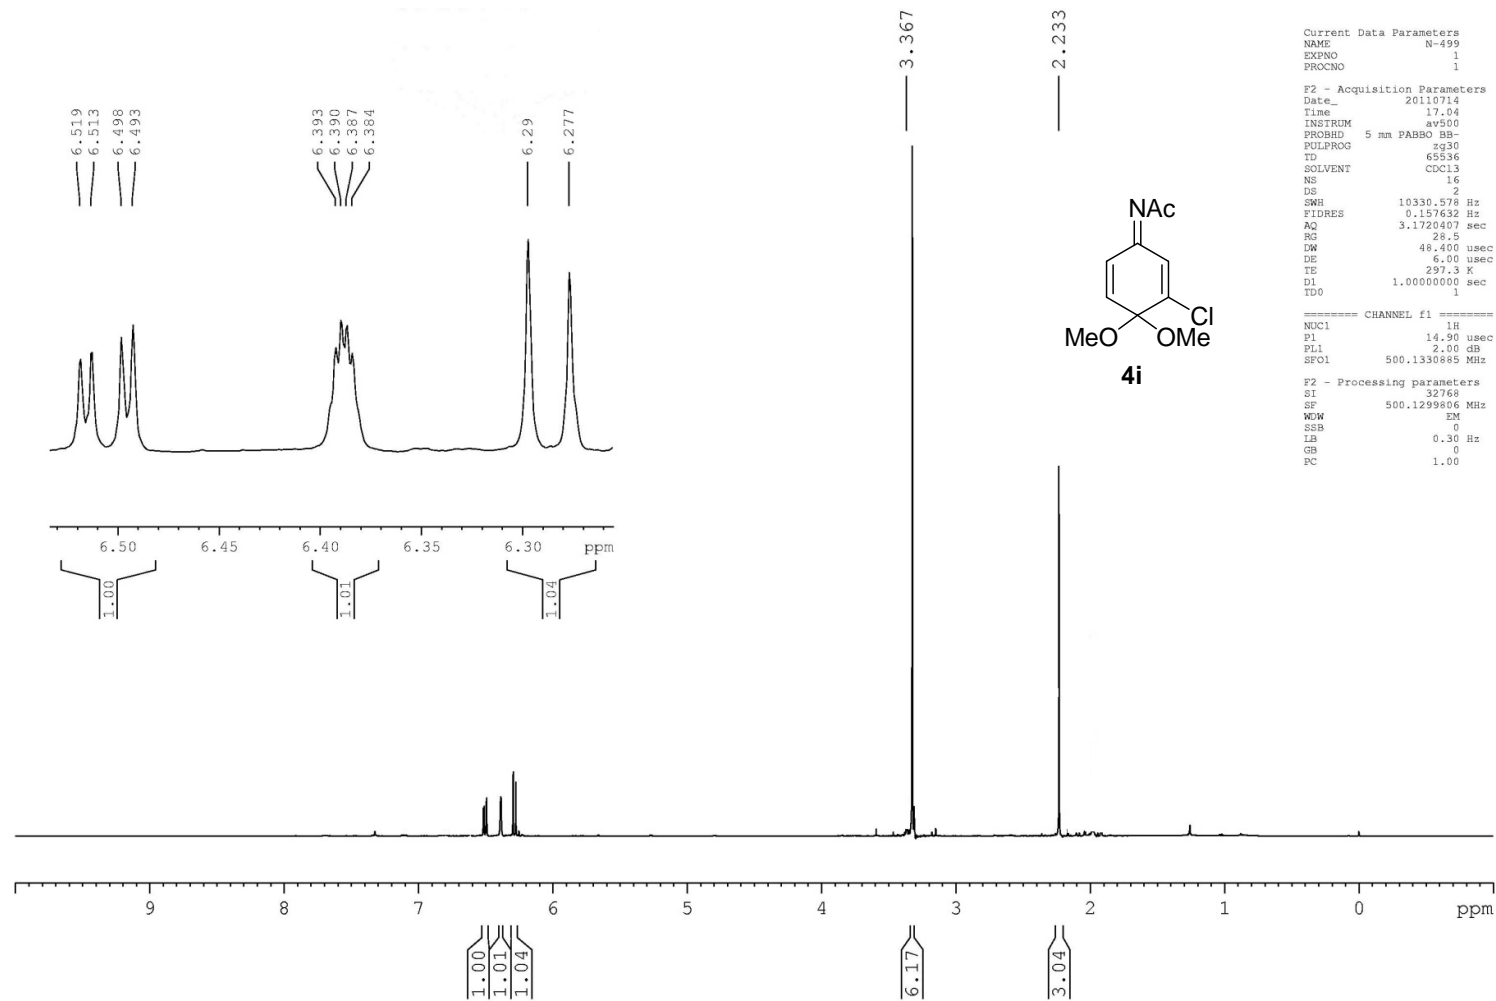

N-499

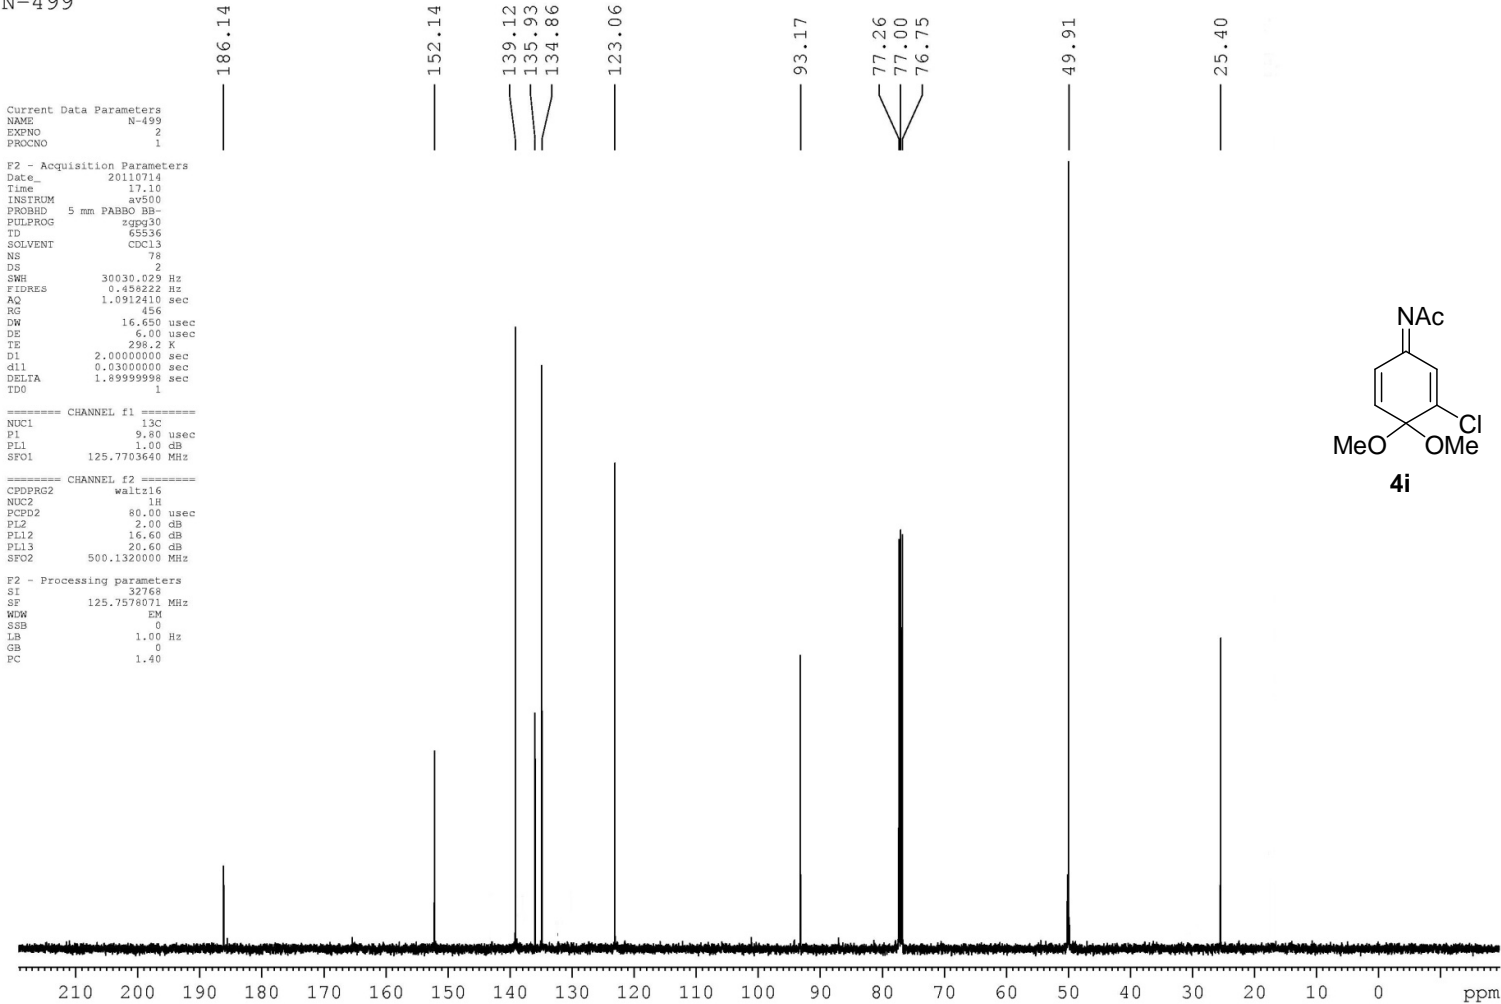

N-502

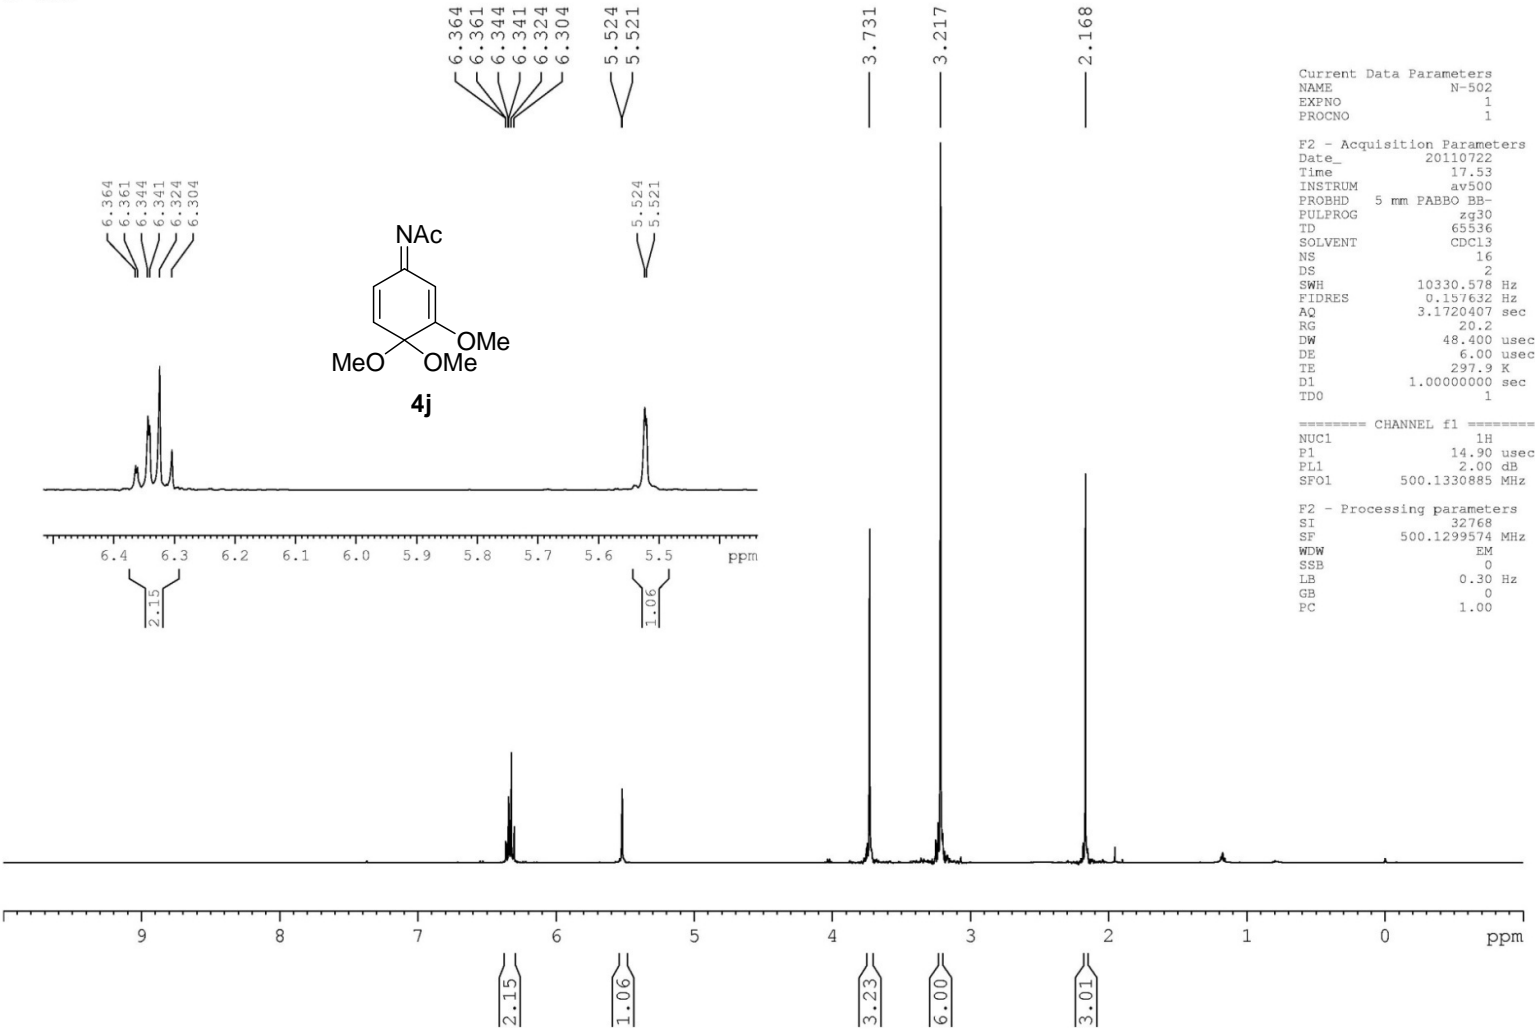

N-502

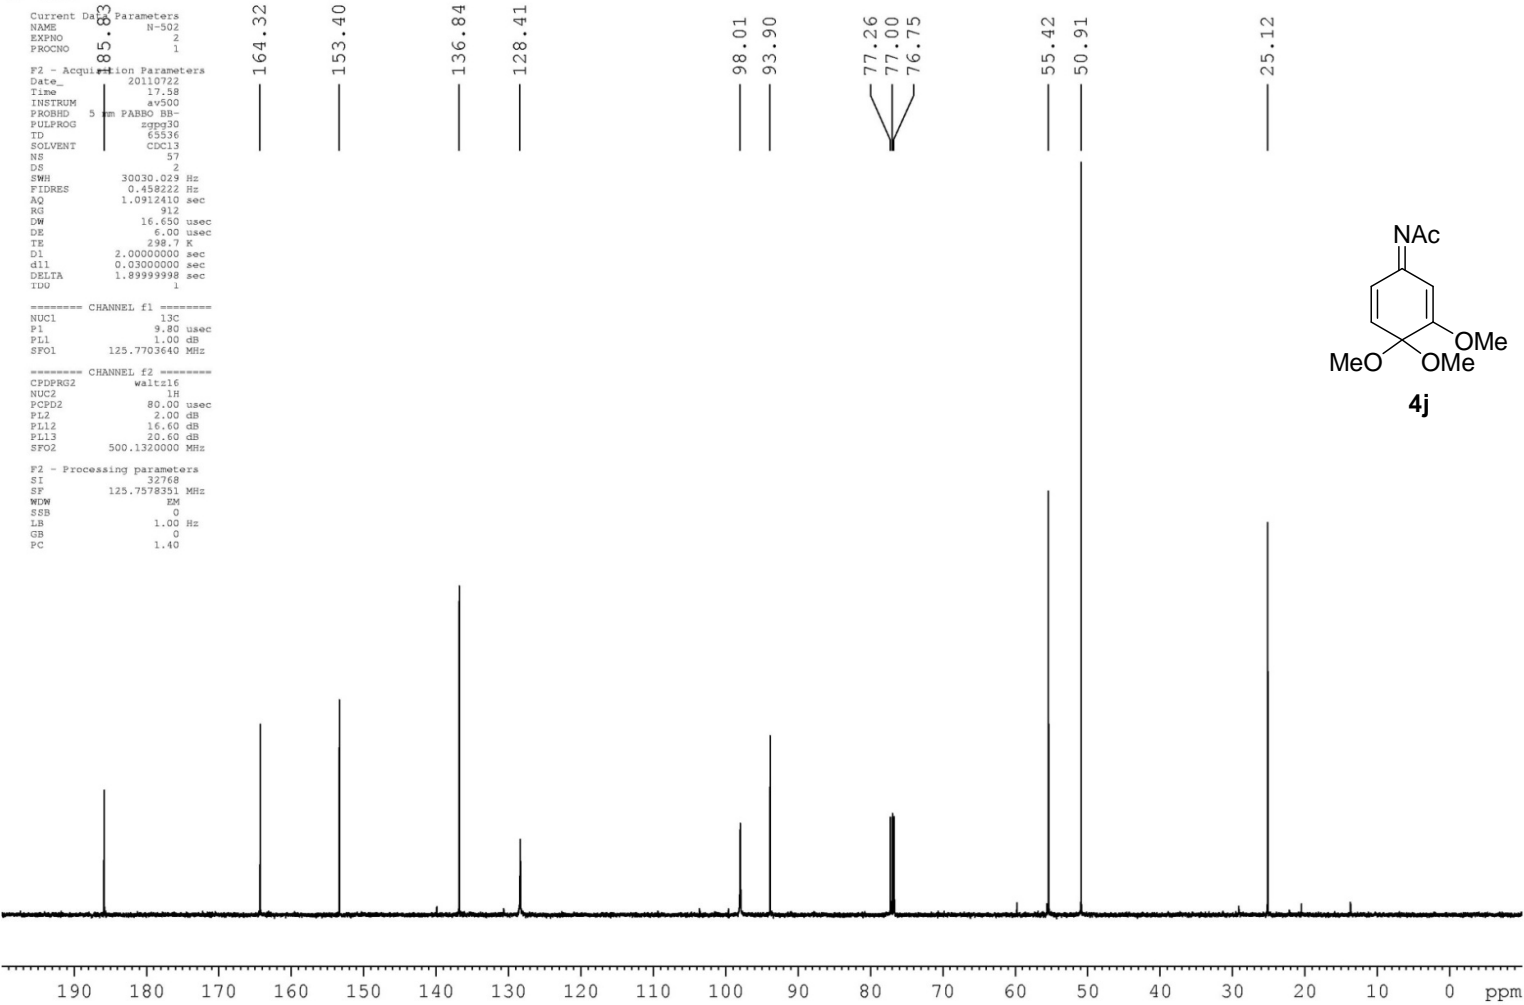

N-503

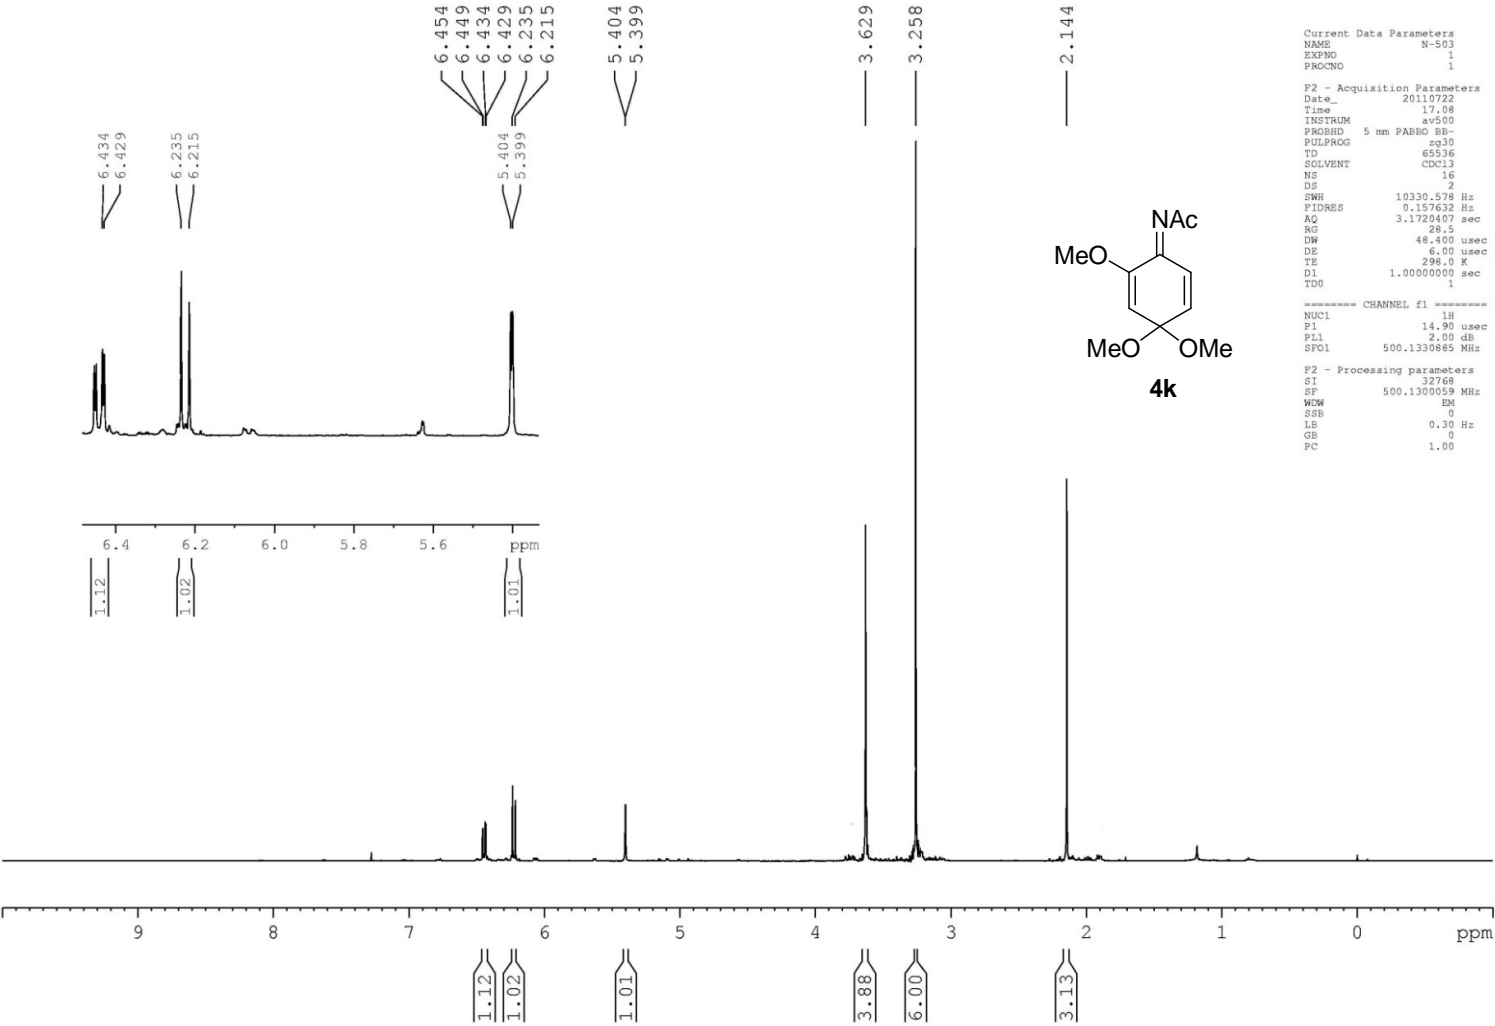

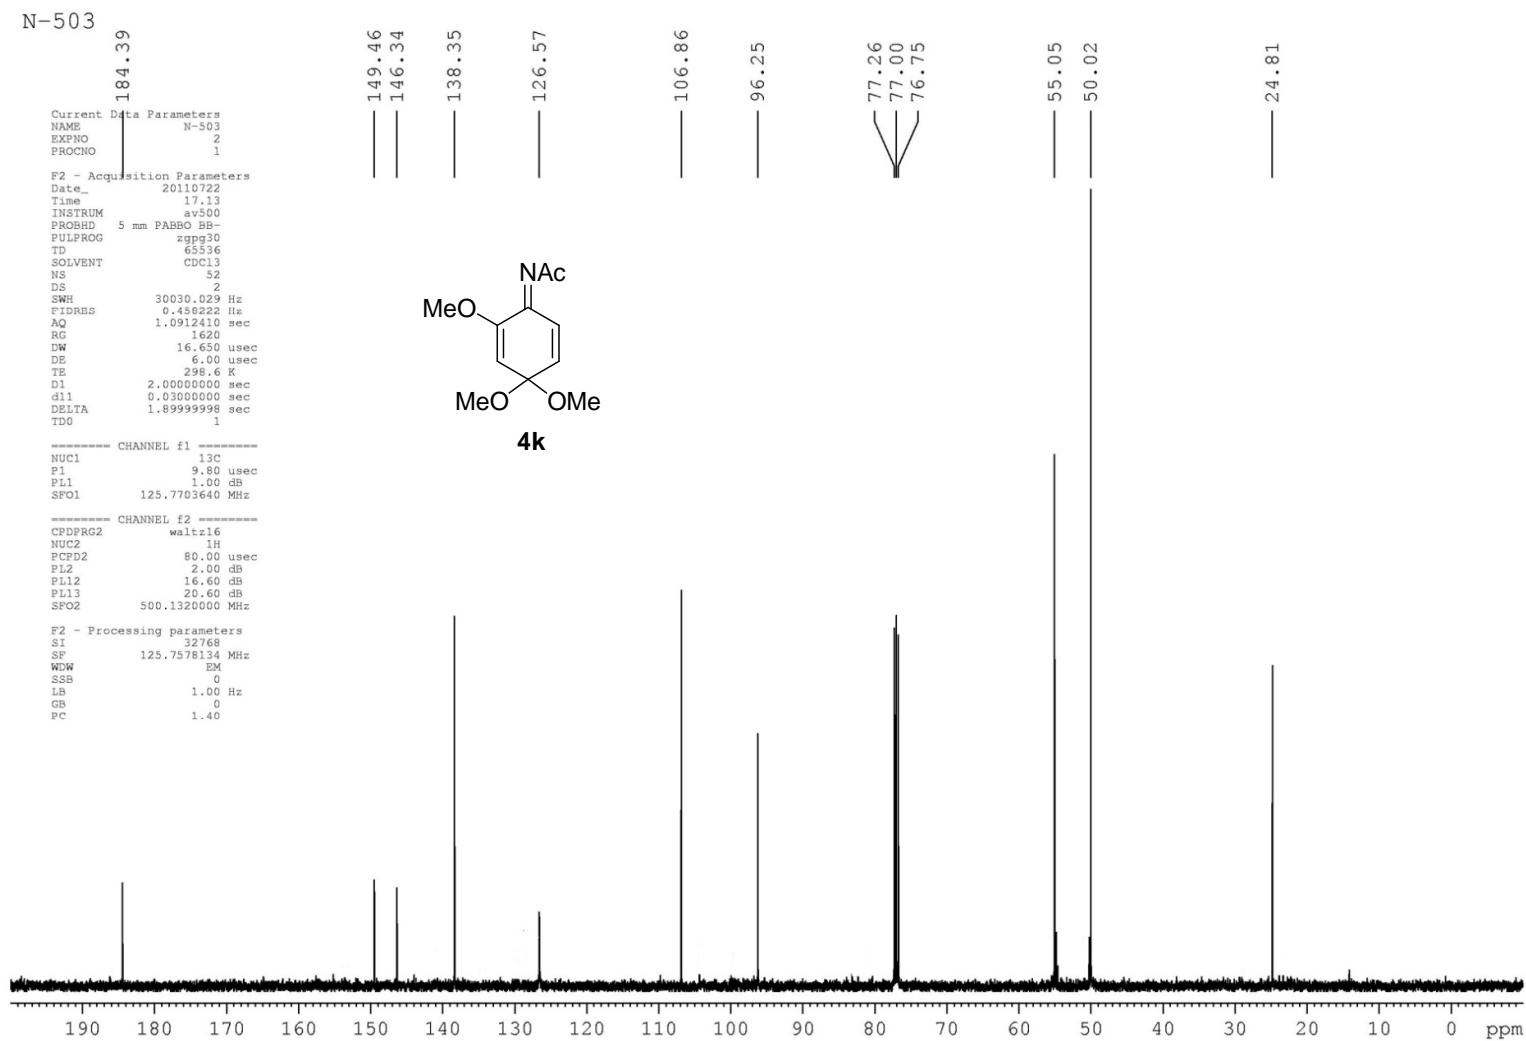

N-507-2

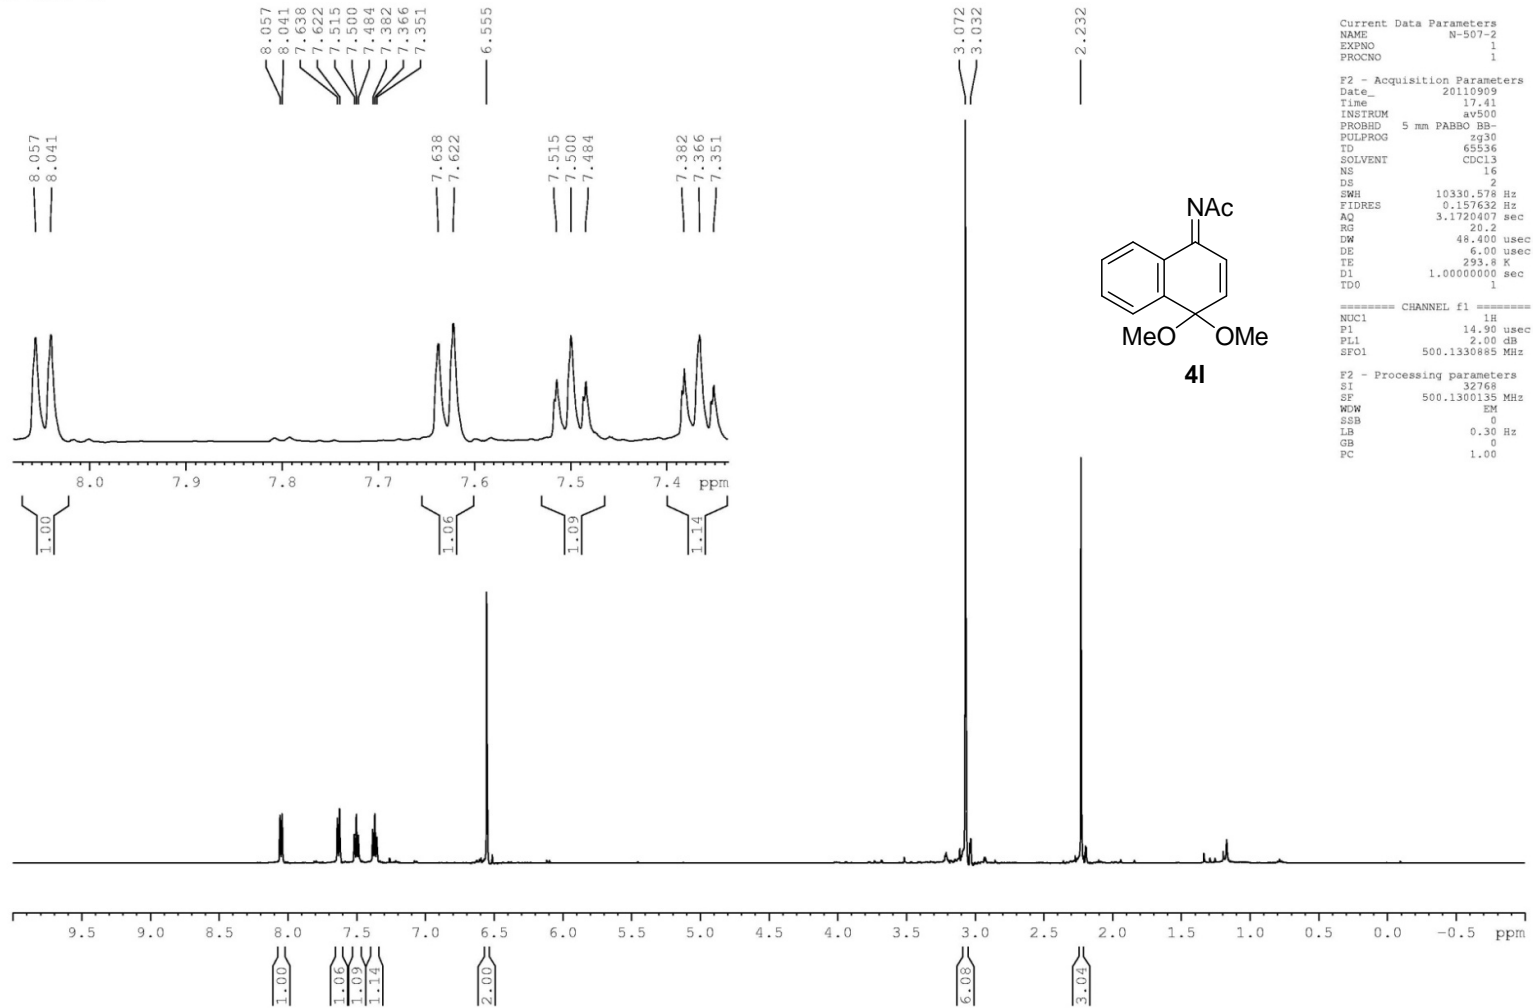

N-507-2

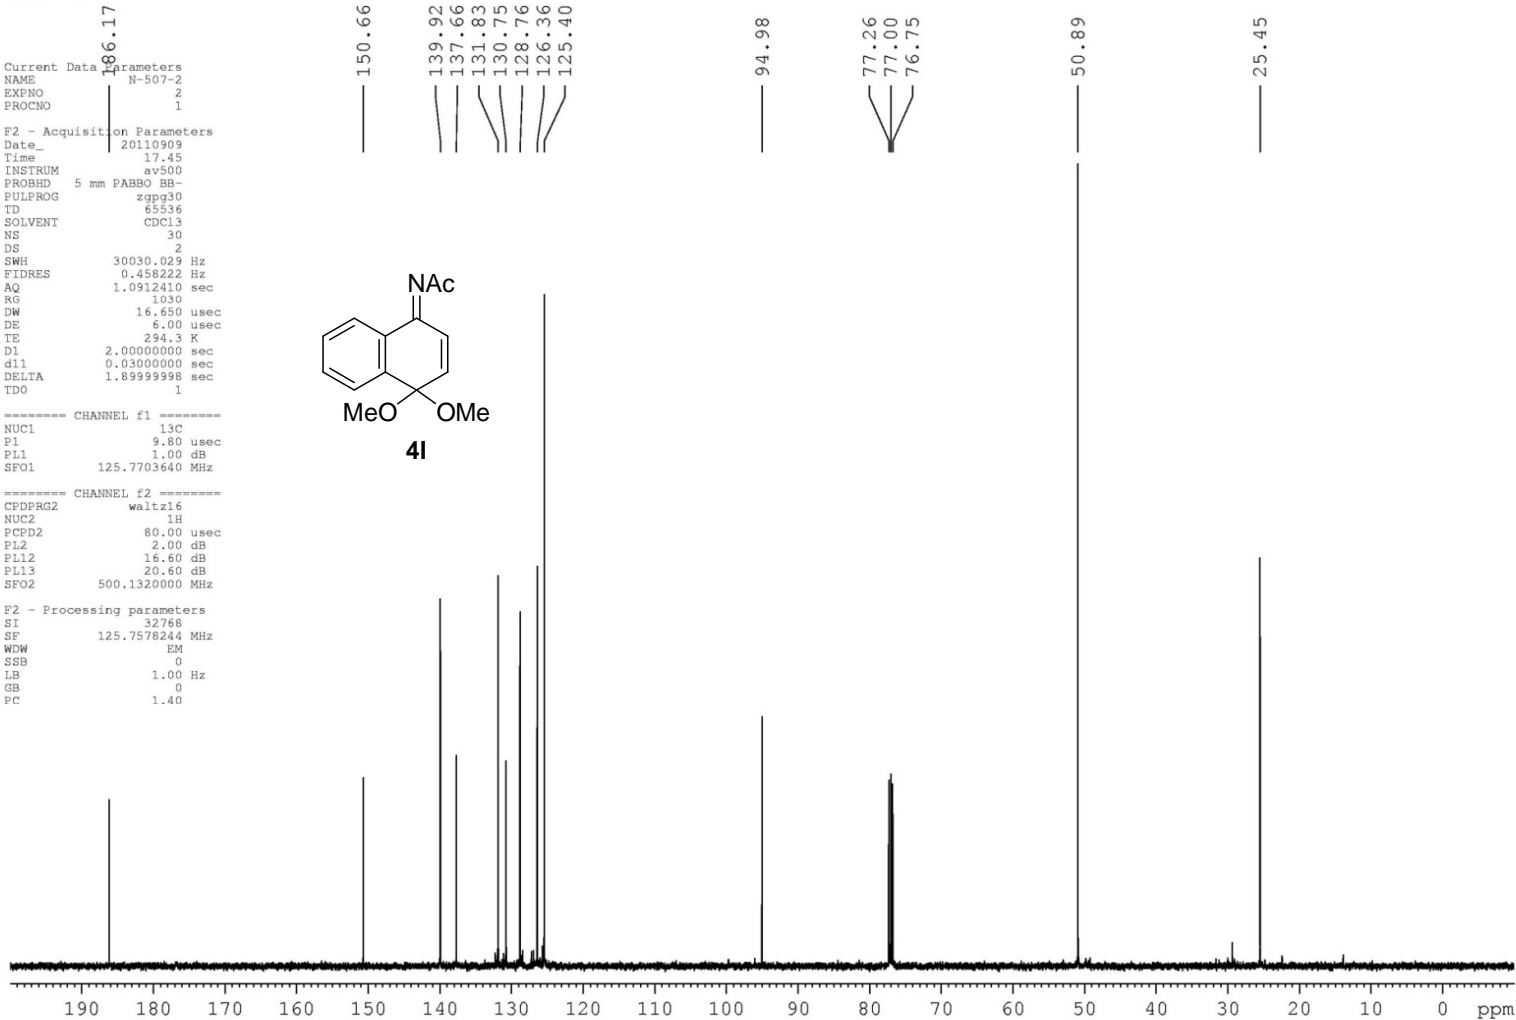

N-496

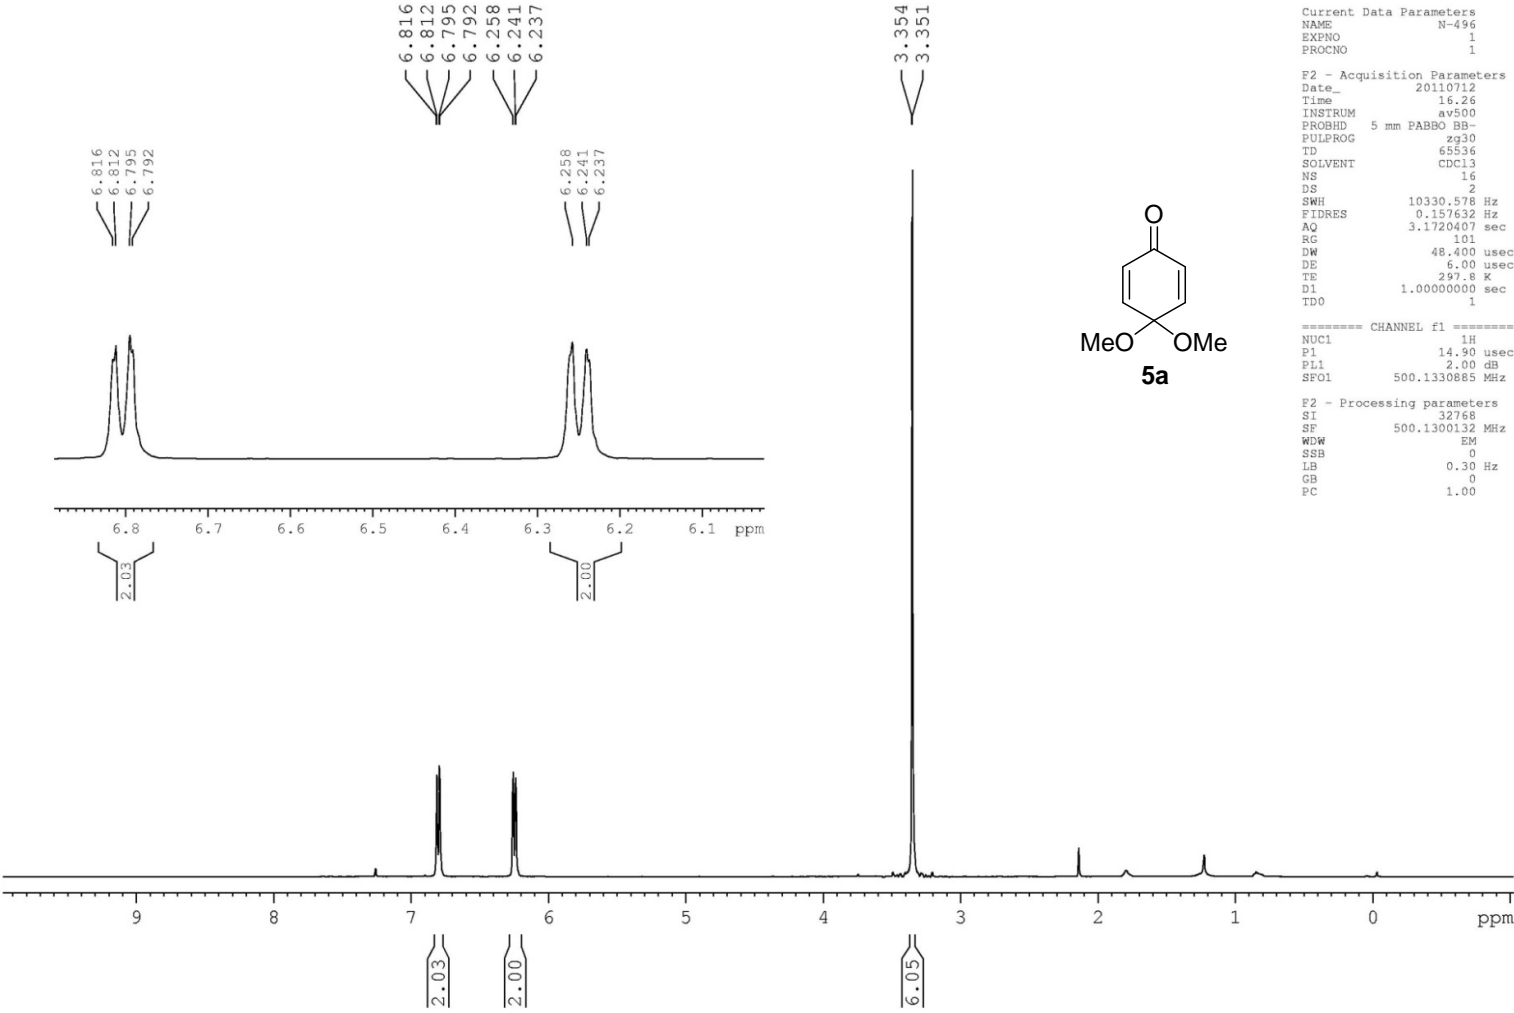

N-496

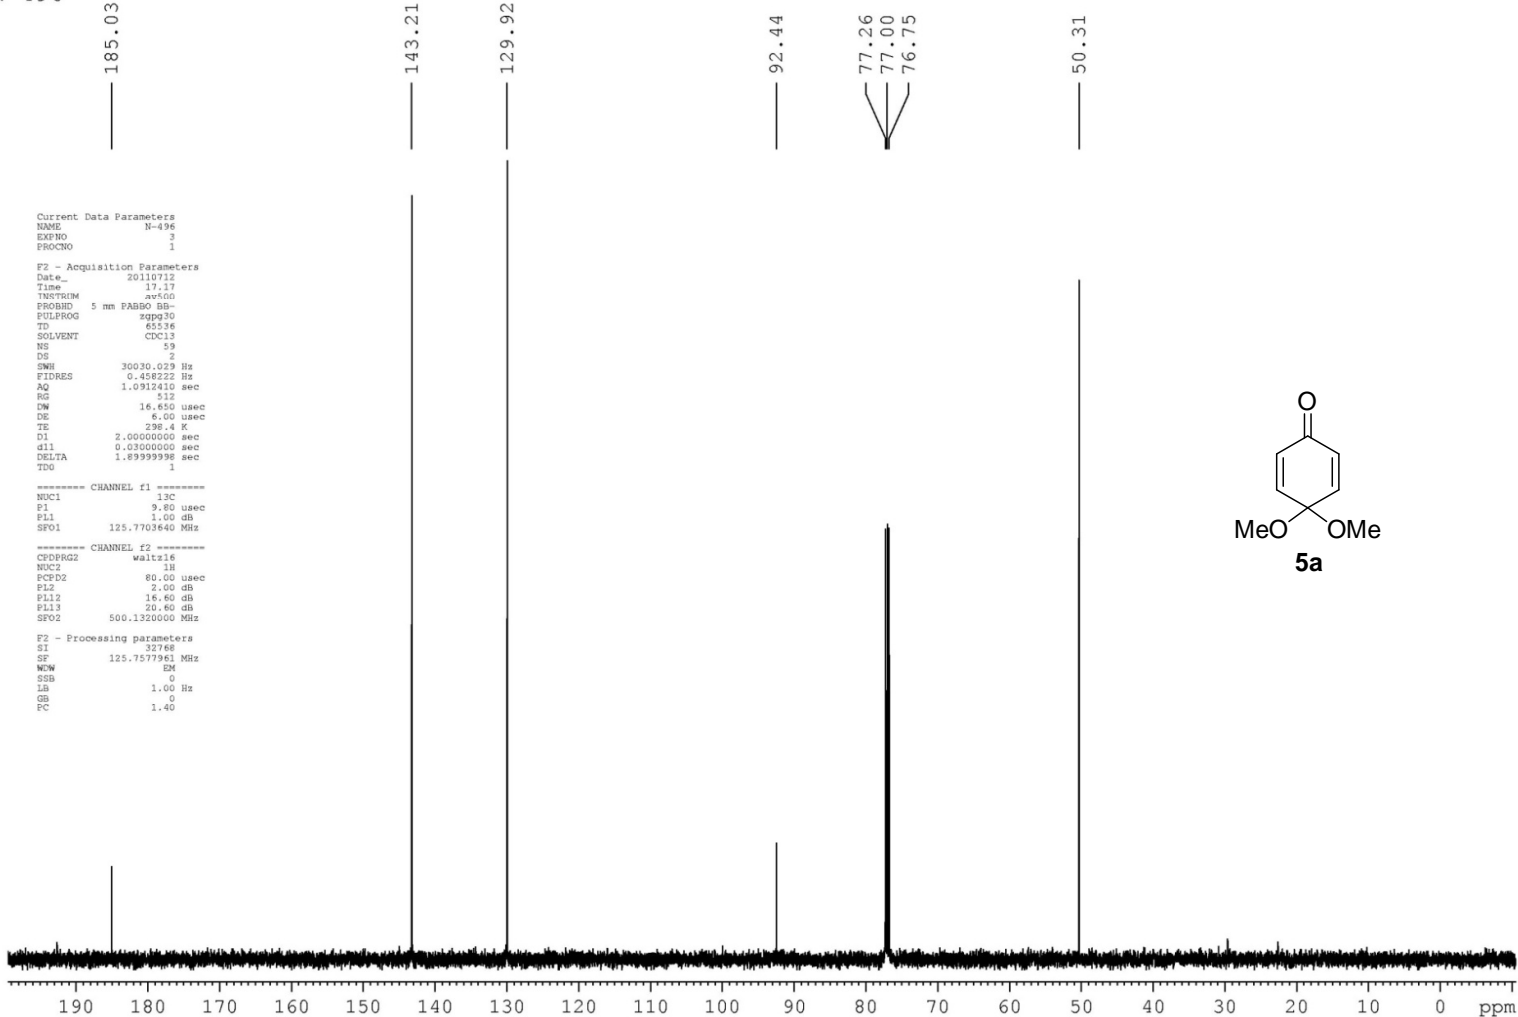

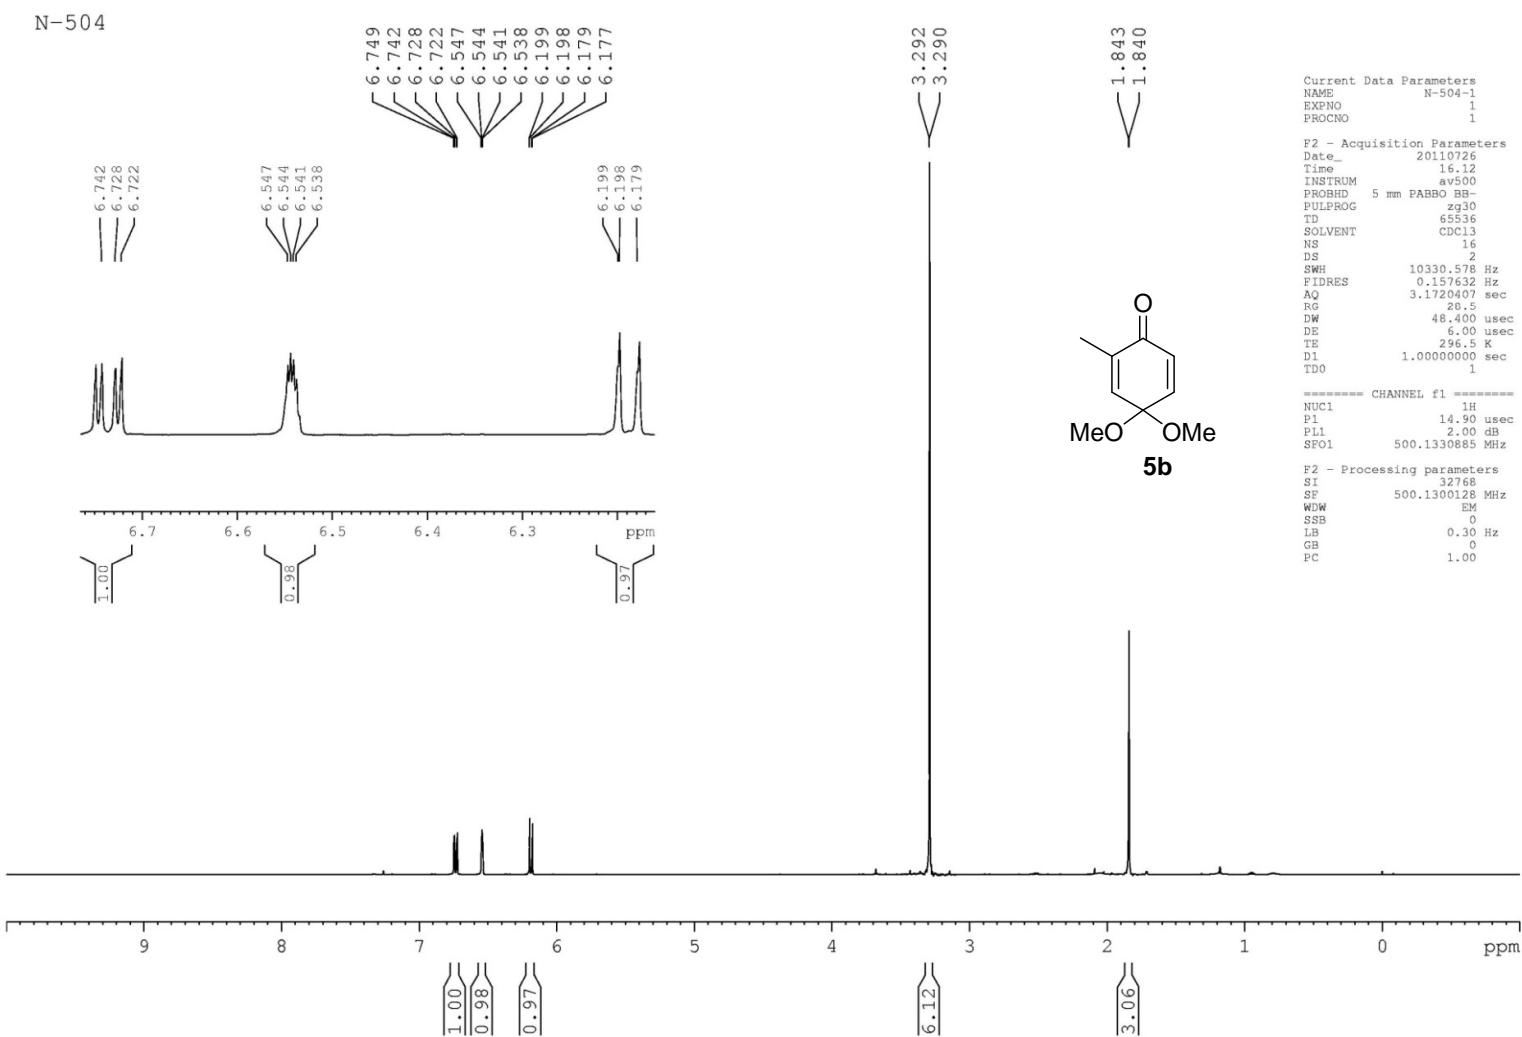

N-504

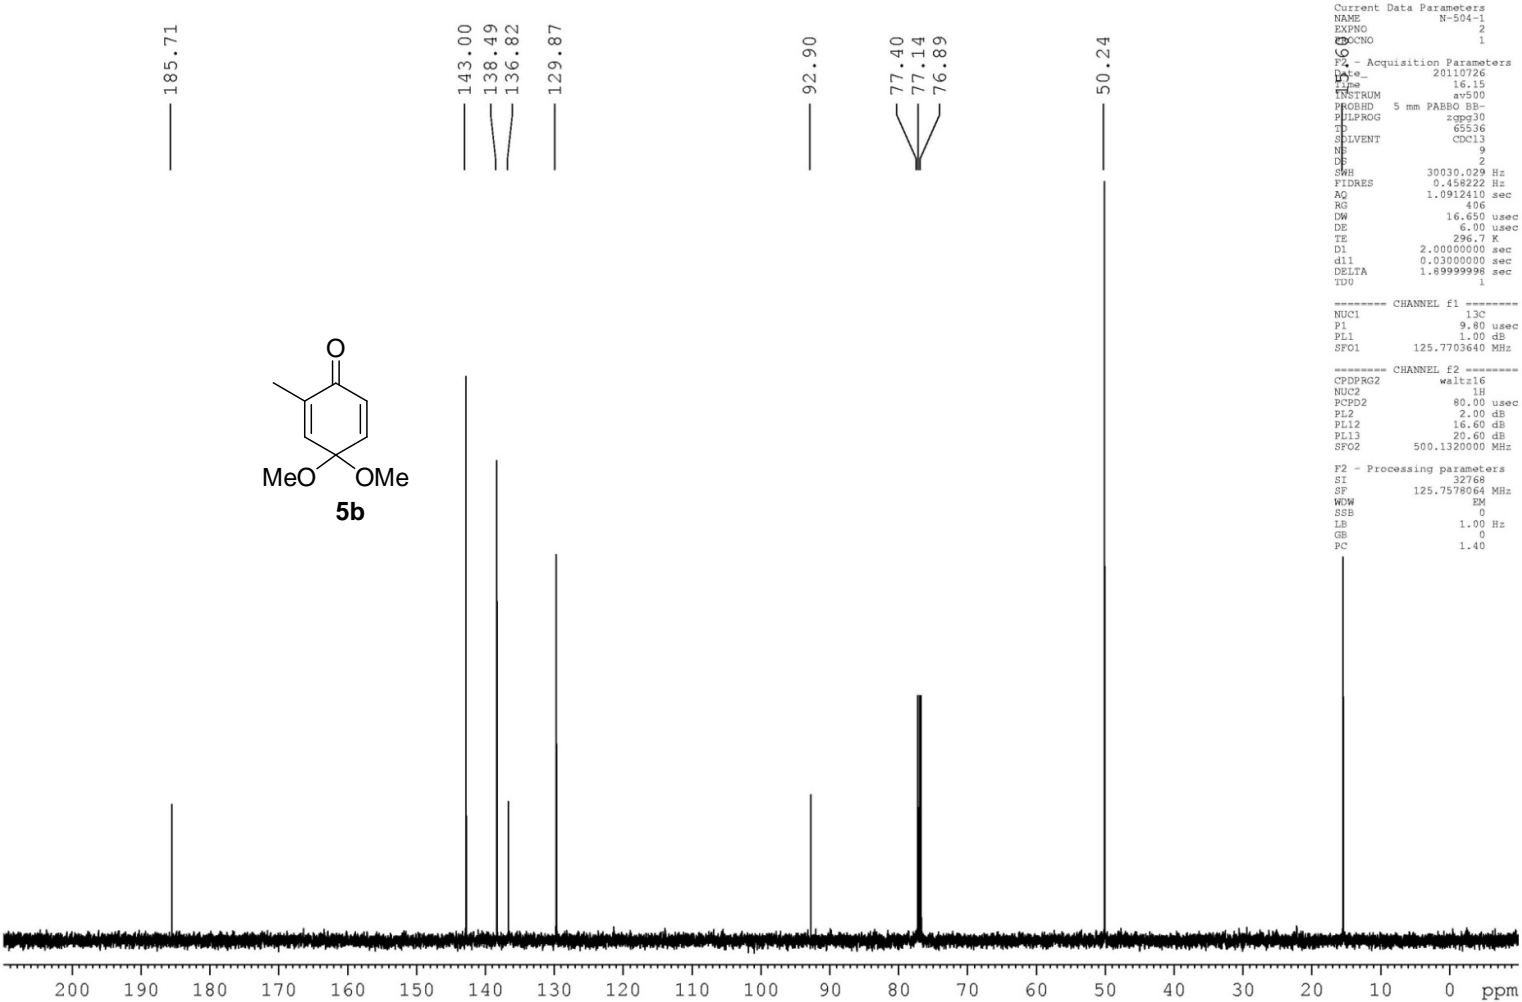

N-505

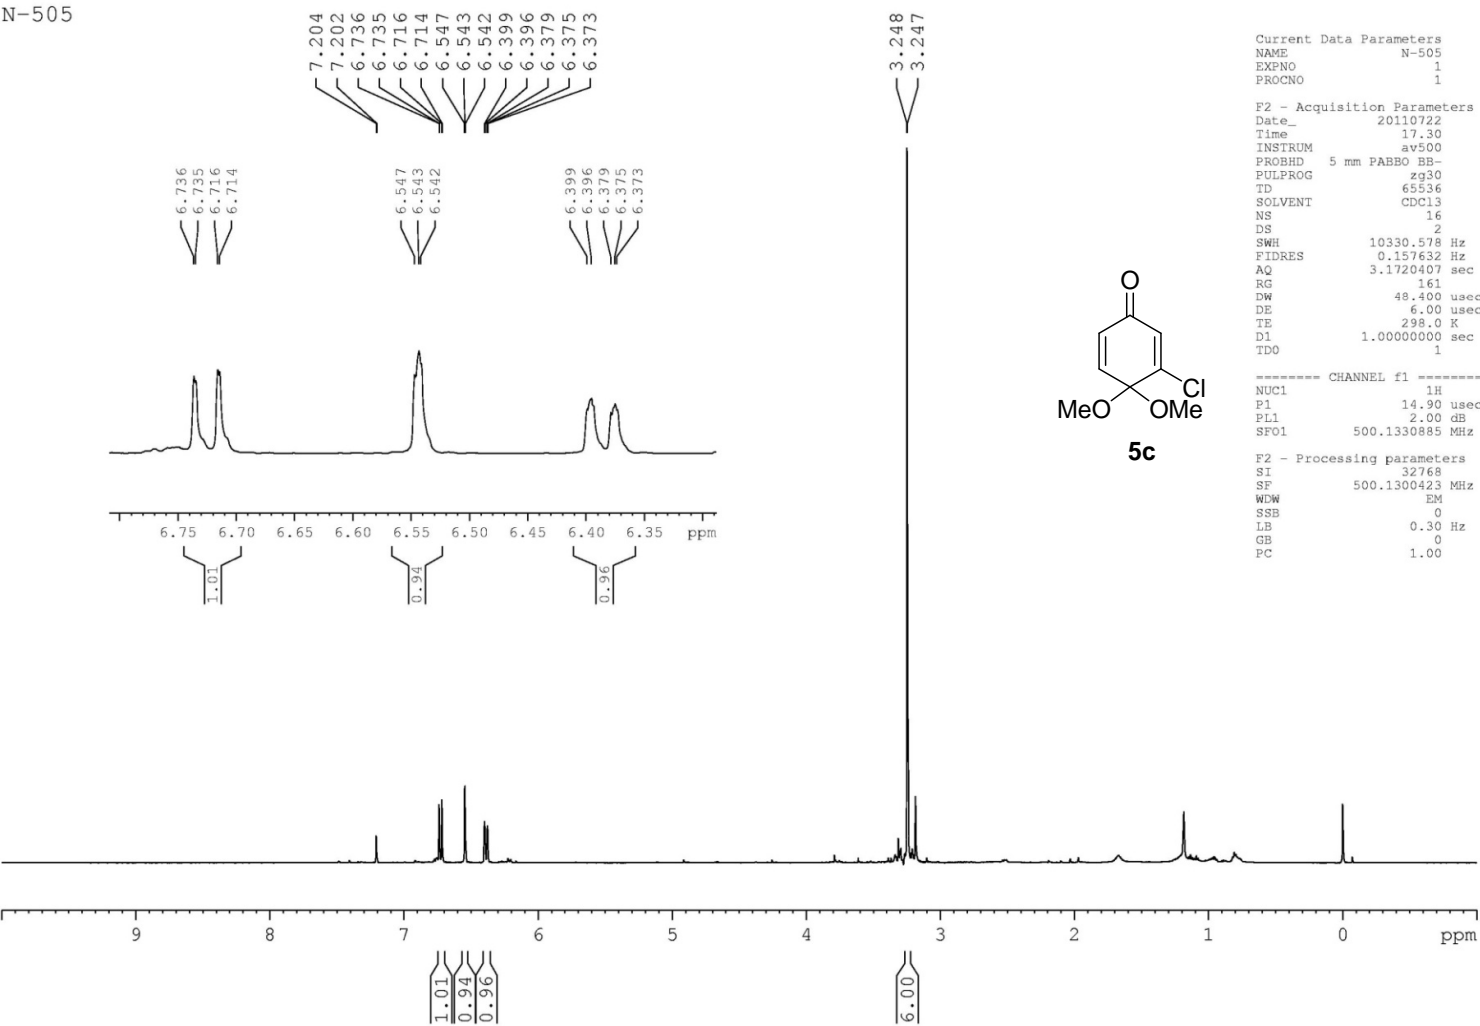

N-505

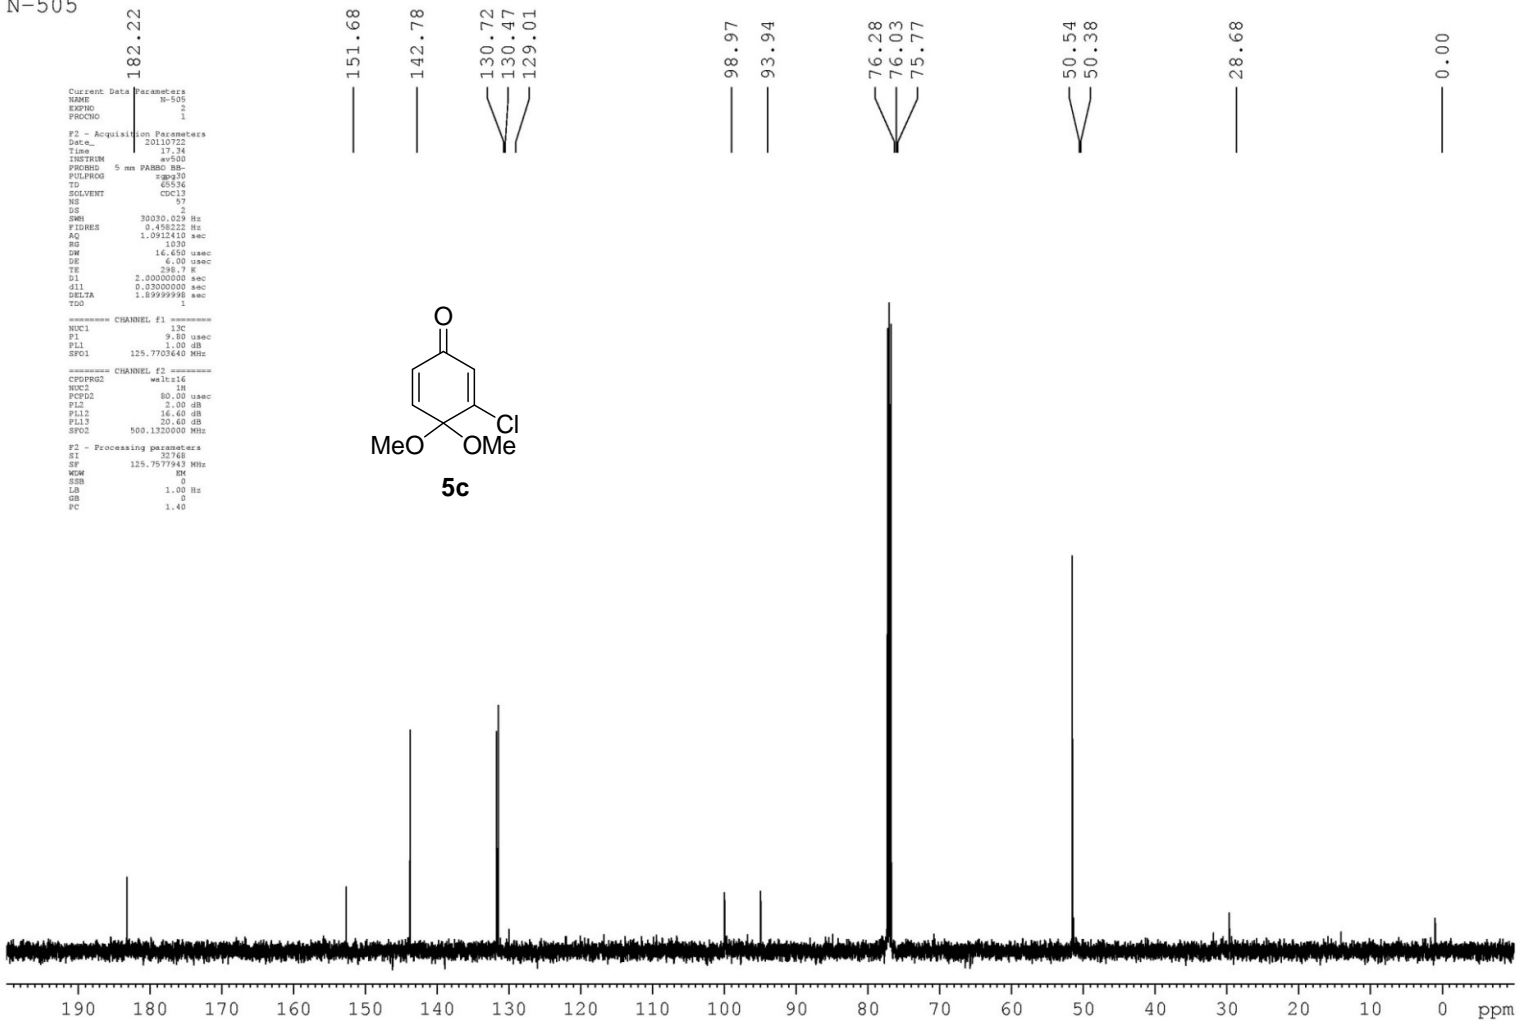

N-5D

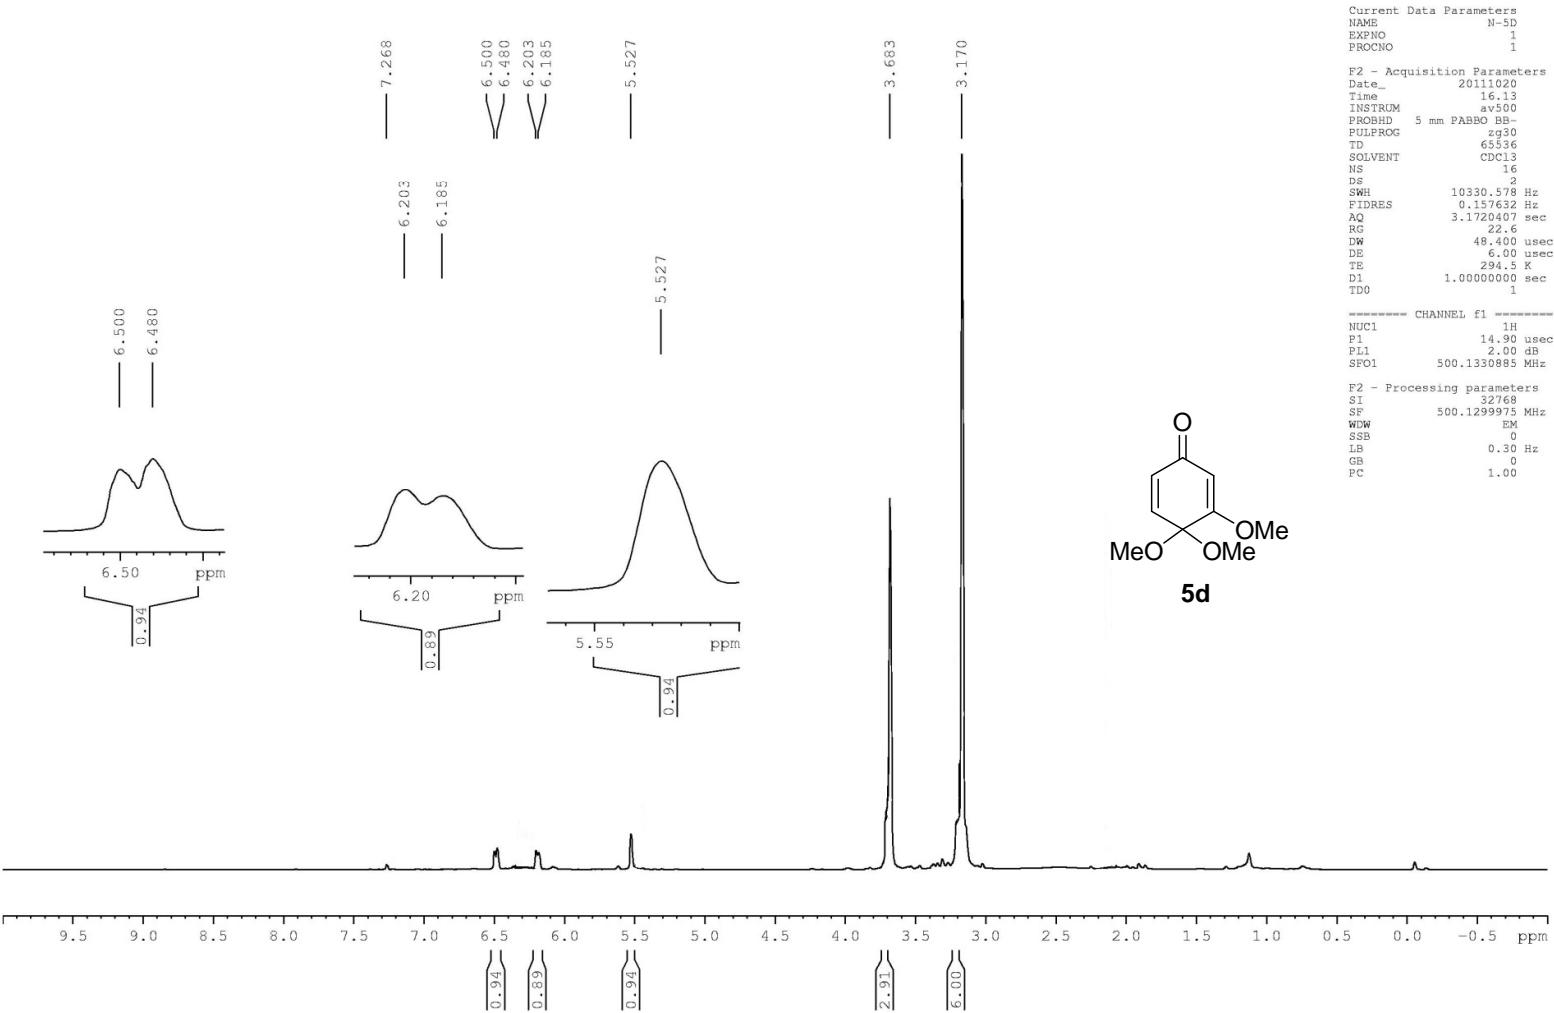

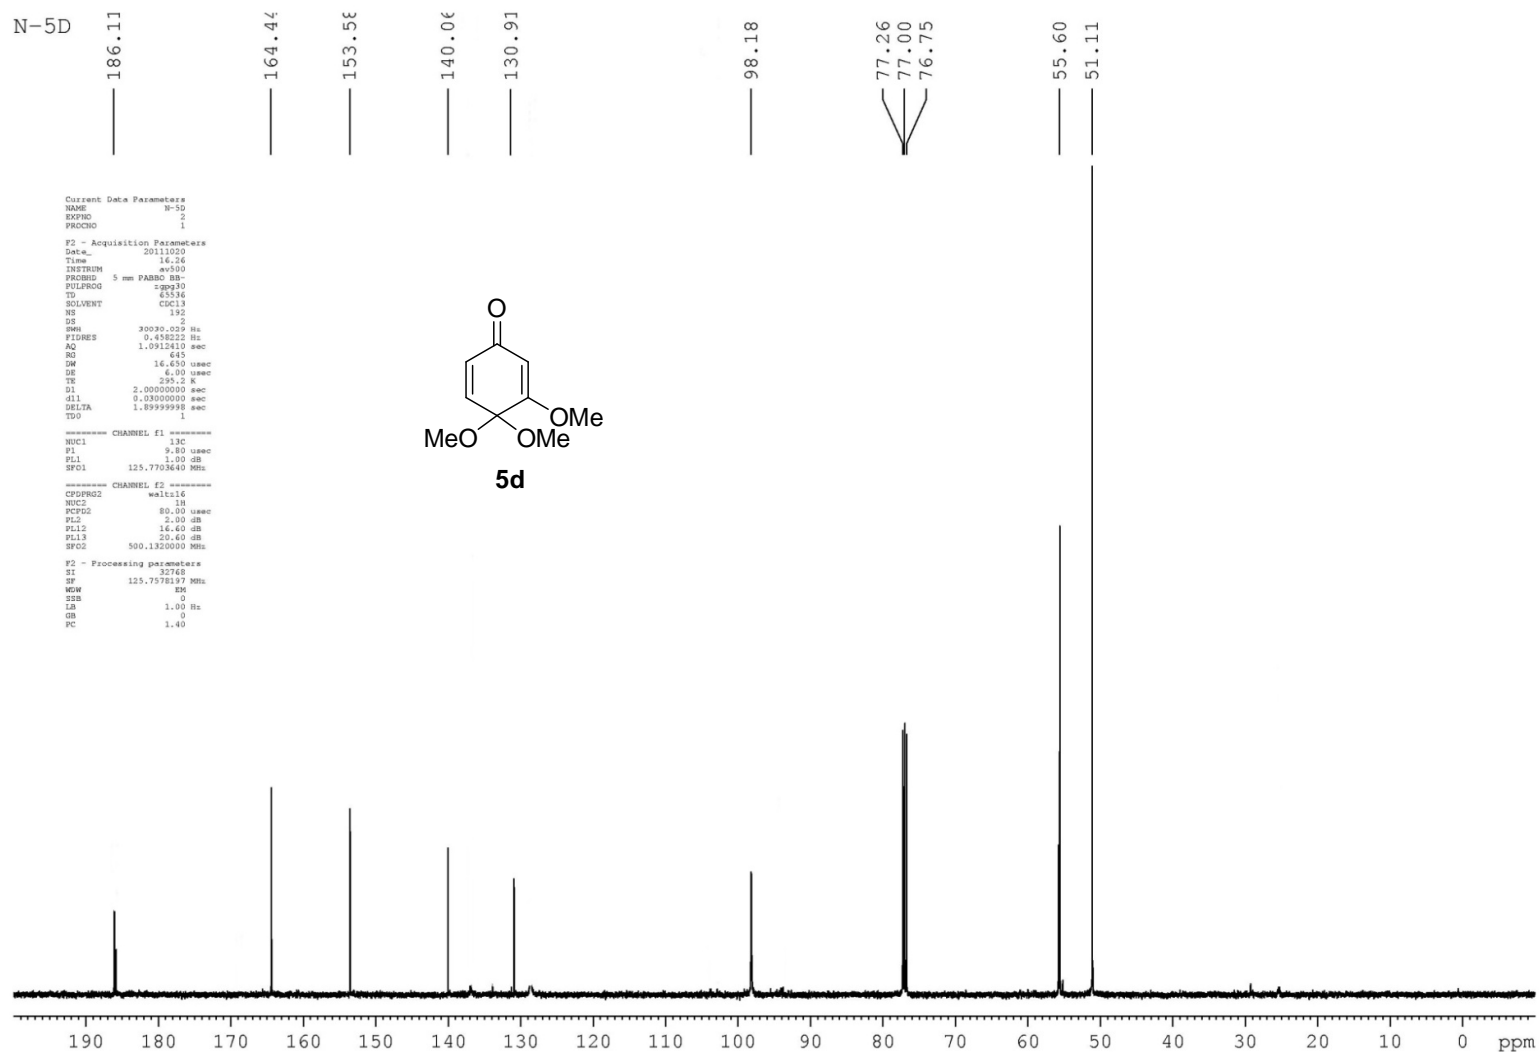

N-5

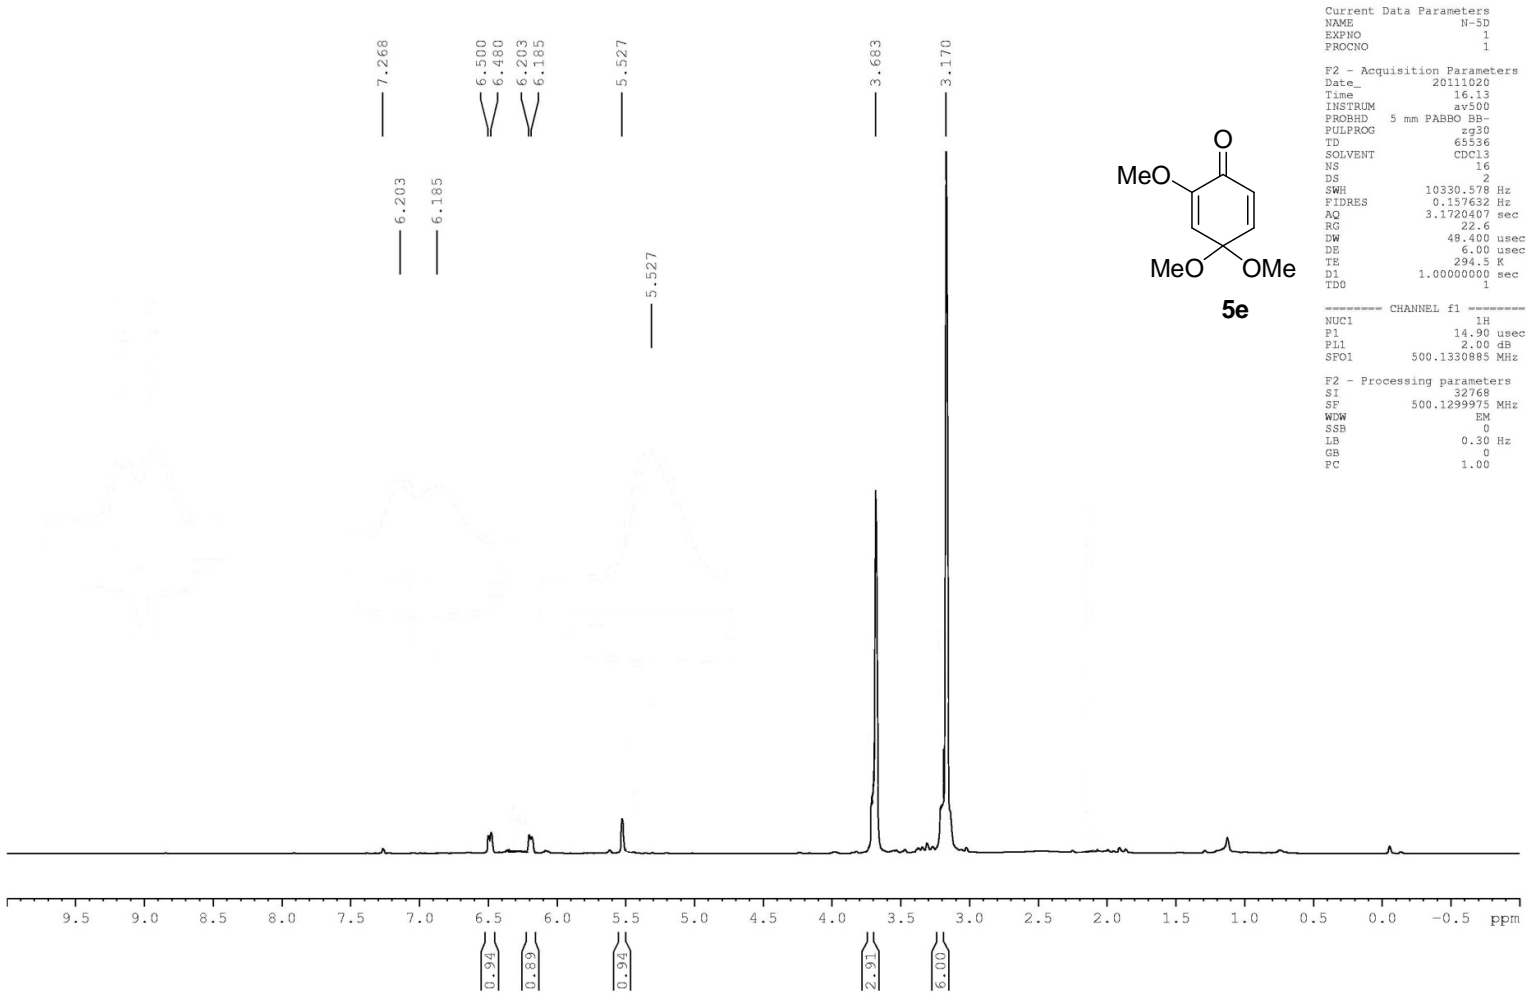

N-5

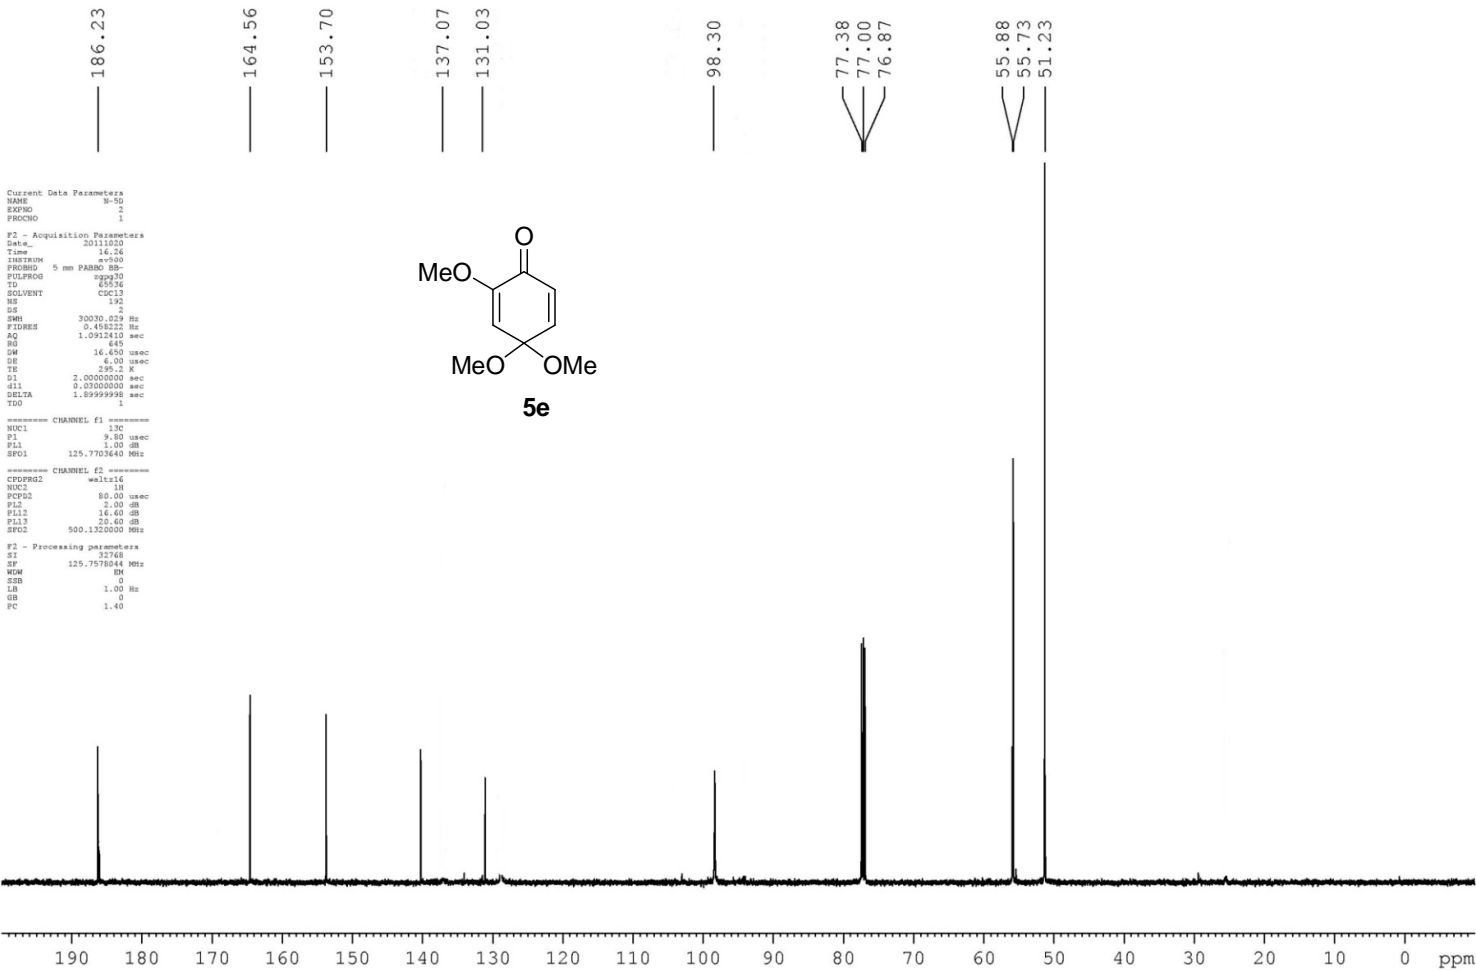

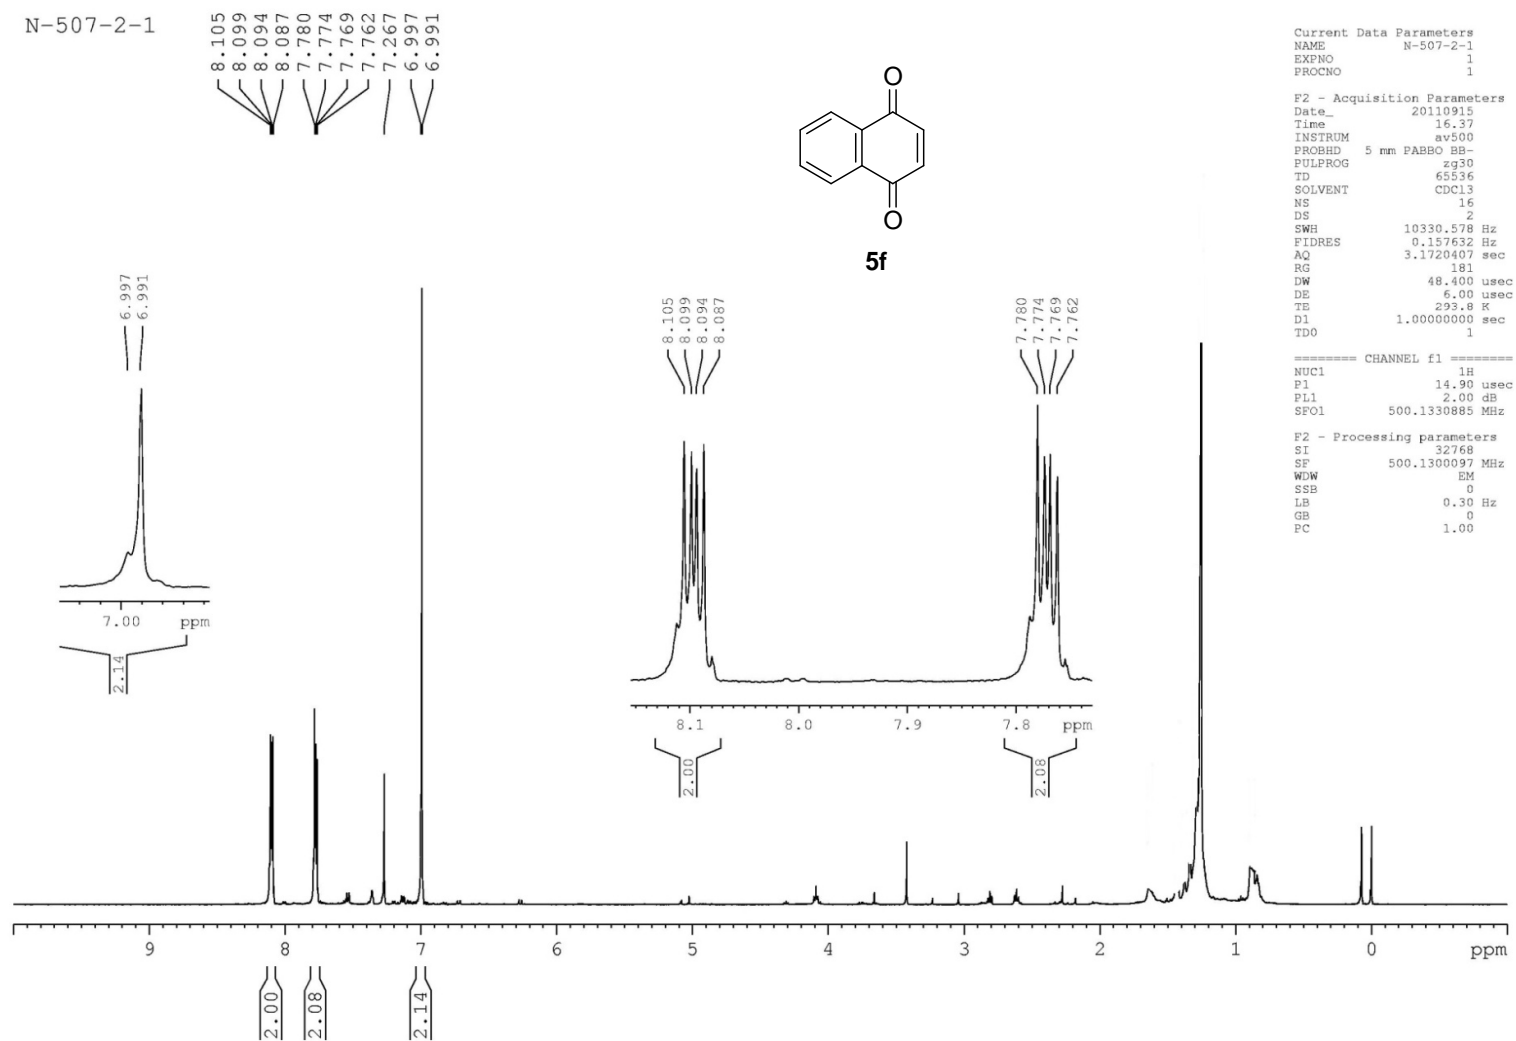

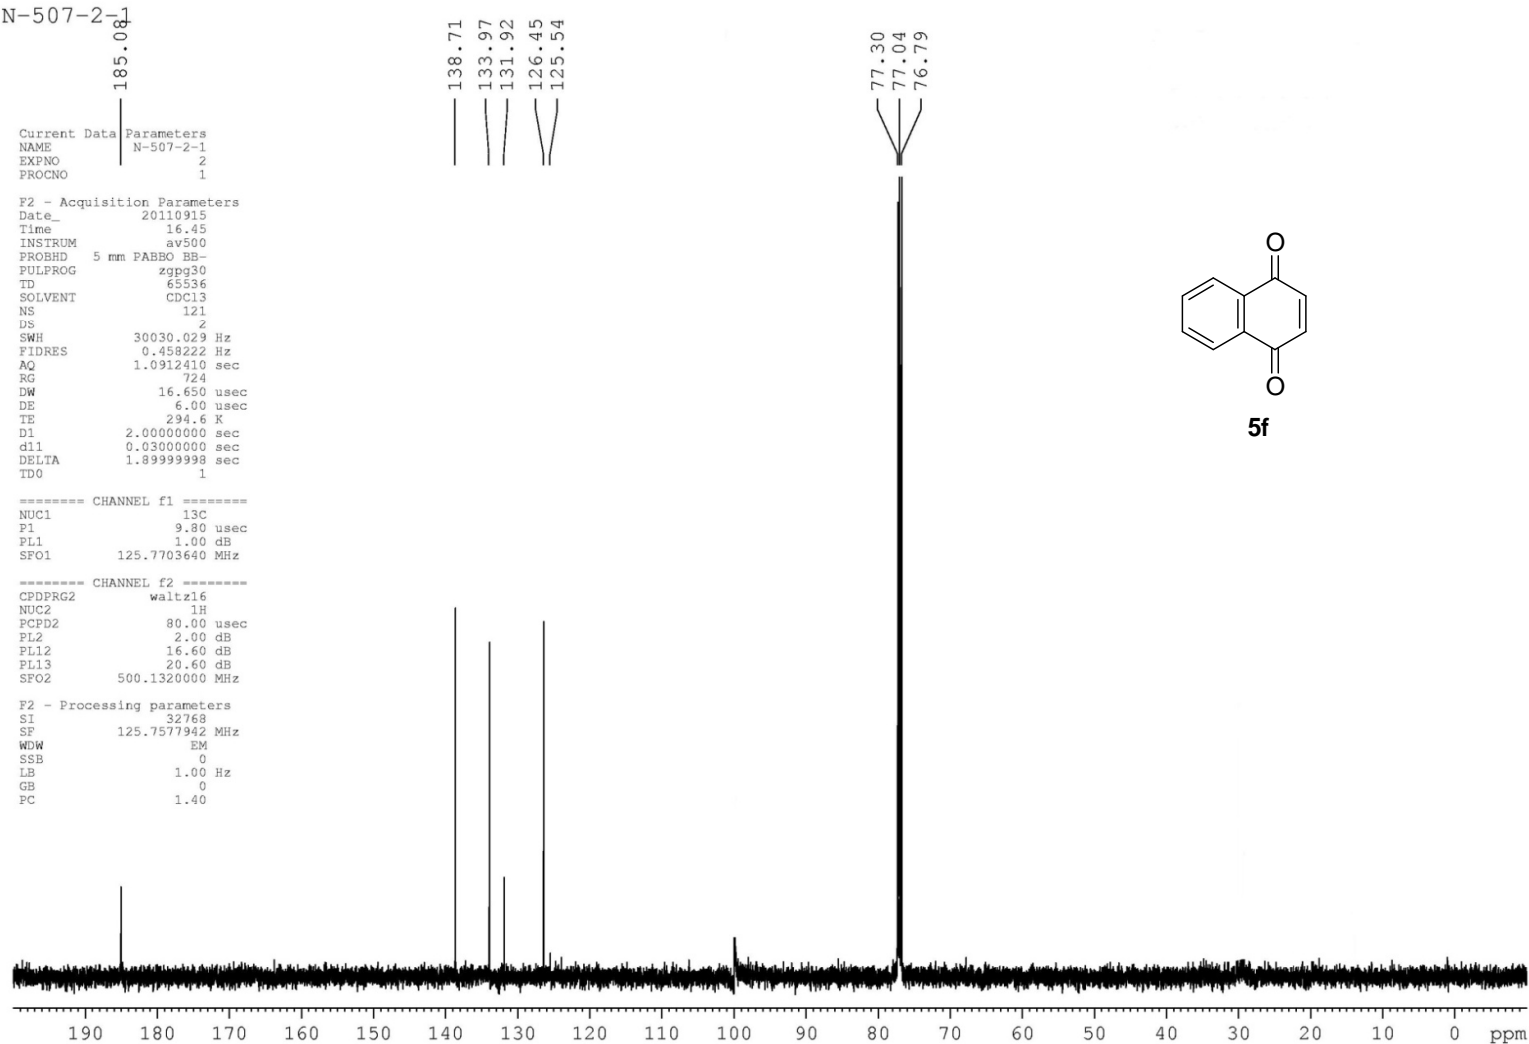

Supplement: c2ob25089f.pdf [file c2ob25089f.pdf]
